# Supplementary material
Source: MDPI journal article supplement (https://www.mdpi.com/1424-8247/16/12/1709)

## Supplementary data

### Synthesis, antimalarial, antileishmanial, and cytotoxicity activities, and preliminary *in silico* ADMET studies of 2-(7-chloroquinolin-4-ylamino)ethyl benzoate derivatives

Joyce E. Gutiérrez <sup>1</sup>, Hegira Ramírez <sup>2,\*</sup>, Esteban Fernandez-Moreira <sup>3</sup>, María E. Acosta <sup>4</sup>, Michael R. Mijares <sup>5</sup>, Juan Bautista De Sanctis <sup>6</sup>, Soňa Gurská <sup>6</sup>, Petr Džubák <sup>6</sup>, Marián Hajdúch <sup>6</sup>, Liesangerli Labrador-Fagúndez <sup>7</sup>, Bruno G. Stella <sup>7</sup>, Luis José Díaz-Pérez <sup>7</sup>, Gustavo Benaim <sup>7,8</sup> and Jaime E. Charris <sup>1,\*</sup>

<sup>1</sup>Organic Synthesis Laboratory, Faculty of Pharmacy, Central University of Venezuela, Los Chaguaramos 1041-A, Caracas 47206, Venezuela; gutierrez.joyce@gmail.com

<sup>2</sup>Facultad de Ciencias de la Salud y Desarrollo Humano, Universidad Ecotec, Km. 13.5 Samborondón, Samborondón, Guayas, Guayaquil, EC092302, Ecuador

<sup>3</sup>Escuela de Medicina, Universidad Espíritu Santo, Samborondón, Guayas, Guayaquil, E092301, Ecuador; estebanfernandez@uees.edu.ec

<sup>4</sup>Unidad de Bioquímica, Facultad de Farmacia, Universidad Central de Venezuela, Los Chaguaramos 1041-A, Caracas 47206, Venezuela; mariuacosta0103@gmail.com

<sup>5</sup>Biotechnology Unit, Faculty of Pharmacy, Central University of Venezuela, 47206, Los Chaguaramos 1041-A, Caracas, Venezuela; michaelfarmacia@gmail.com

<sup>6</sup>Institute of Molecular and Translational Medicine, Faculty of Medicine and Dentistry, Palacky University, Hněvotínská 1333/5, Olomouc 779 00, Czech Republic; juanbautista.desanctis@upol.cz (JDS); sona.gurska@upol.cz (SG); petr.dzubak@upol.cz (PD); marian.hajduch@upol.cz (MH)

<sup>7</sup>Unidad de Bioquímica de Parásitos y Señalización Celular. Instituto de Estudios Avanzados (IDEA). Caracas. Venezuela

<sup>8</sup>Instituto de Biología Experimental. Facultad de Ciencias. Universidad Central de Venezuela. Caracas. Venezuela. gbenaim@gmail.com

## Table of Contents

|            |                                        | Page |
|------------|----------------------------------------|------|
| <b>S1</b>  | The IR spectrum of 2                   | 4    |
| <b>S2</b>  | The $^1\text{H}$ NMR spectrum of 2     | 4    |
| <b>S3</b>  | The $^{13}\text{C}$ NMR spectrum of 2  | 5    |
| <b>S4</b>  | The DEPT 135° spectrum of 2            | 5    |
| <b>S5</b>  | The IR spectrum of 4a                  | 6    |
| <b>S6</b>  | The $^1\text{H}$ NMR spectrum of 4a    | 6    |
| <b>S7</b>  | The $^{13}\text{C}$ NMR spectrum of 4a | 7    |
| <b>S8</b>  | The DEPT 135° spectrum of 4a           | 7    |
| <b>S9</b>  | The COSY spectrum of 4a                | 8    |
| <b>S10</b> | The HETCOR spectrum of 4a              | 8    |
| <b>S11</b> | The IR spectrum of 4b                  | 9    |
| <b>S12</b> | The $^1\text{H}$ NMR spectrum of 4b    | 9    |
| <b>S13</b> | The $^{13}\text{C}$ NMR spectrum of 4b | 10   |
| <b>S14</b> | The DEPT 135° spectrum of 4b           | 10   |
| <b>S15</b> | The IR spectrum of 4c                  | 11   |
| <b>S16</b> | The $^1\text{H}$ NMR spectrum of 4c    | 11   |
| <b>S17</b> | The $^{13}\text{C}$ NMR spectrum of 4c | 12   |
| <b>S18</b> | The DEPT 135° spectrum of 4c           | 12   |
| <b>S19</b> | The COSY spectrum of 4c                | 13   |
| <b>S20</b> | The HETCOR spectrum of 4c              | 13   |
| <b>S21</b> | The IR spectrum of 4d                  | 14   |
| <b>S22</b> | The $^1\text{H}$ NMR spectrum of 4d    | 14   |
| <b>S23</b> | The $^{13}\text{C}$ NMR spectrum of 4d | 15   |
| <b>S24</b> | The IR spectrum of 4e                  | 16   |
| <b>S25</b> | The $^1\text{H}$ NMR spectrum of 4e    | 16   |
| <b>S26</b> | The $^{13}\text{C}$ NMR spectrum of 4e | 16   |
| <b>S27</b> | The DEPT 135° spectrum of 4e           | 17   |
| <b>S28</b> | The IR spectrum of 4f                  | 18   |
| <b>S29</b> | The $^1\text{H}$ NMR spectrum of 4f    | 18   |
| <b>S30</b> | The $^{13}\text{C}$ NMR spectrum of 4f | 19   |
| <b>S31</b> | The DEPT 135° spectrum of 4f           | 19   |
| <b>S32</b> | The COSY spectrum of 4f                | 20   |
| <b>S33</b> | The IR spectrum of 4g                  | 21   |
| <b>S34</b> | The $^1\text{H}$ NMR spectrum of 4g    | 21   |
| <b>S35</b> | The $^{13}\text{C}$ NMR spectrum of 4g | 22   |
| <b>S36</b> | The DEPT 135° spectrum of 4g           | 22   |
| <b>S37</b> | The COSY spectrum of 4g                | 23   |
| <b>S38</b> | The HETCOR spectrum of 4g              | 23   |
| <b>S39</b> | The IR spectrum of 4h                  | 24   |
| <b>S40</b> | The $^1\text{H}$ NMR spectrum of 4h    | 24   |
| <b>S41</b> | The $^{13}\text{C}$ NMR spectrum of 4h | 25   |

|            |                                        |    |
|------------|----------------------------------------|----|
| <b>S42</b> | The DEPT 135° spectrum of 4h           | 25 |
| <b>S43</b> | The COSY spectrum of 4h                | 26 |
| <b>S44</b> | The IR spectrum of 4i                  | 27 |
| <b>S45</b> | The <sup>1</sup> H NMR spectrum of 4i  | 27 |
| <b>S46</b> | The <sup>13</sup> C NMR spectrum of 4i | 28 |
| <b>S47</b> | The DEPT 135° spectrum of 4i           | 28 |
| <b>S48</b> | The COSY spectrum of 4i                | 29 |
| <b>S49</b> | The IR spectrum of 4j                  | 30 |
| <b>S50</b> | The <sup>1</sup> H NMR spectrum of 4j  | 30 |
| <b>S51</b> | The <sup>13</sup> C NMR spectrum of 4j | 31 |
| <b>S52</b> | The DEPT 135° spectrum of 4j           | 31 |
| <b>S53</b> | The IR spectrum of 4l                  | 32 |
| <b>S54</b> | The <sup>1</sup> H NMR spectrum of 4l  | 32 |
| <b>S55</b> | The <sup>13</sup> C NMR spectrum of 4l | 33 |
| <b>S56</b> | The DEPT 135° spectrum of 4l           | 33 |
| <b>S57</b> | The COSY spectrum of 4l                | 34 |
| <b>S58</b> | The HETCOR spectrum of 4l              | 34 |
| <b>S59</b> | The IR spectrum of 4m                  | 35 |
| <b>S60</b> | The <sup>1</sup> H NMR spectrum of 4m  | 35 |
| <b>S61</b> | The <sup>13</sup> C NMR spectrum of 4m | 36 |
| <b>S62</b> | The DEPT 135° spectrum of 4m           | 36 |
| <b>S63</b> | <sup>19</sup> F NMR 4m                 | 37 |

## S1. Comp. 2

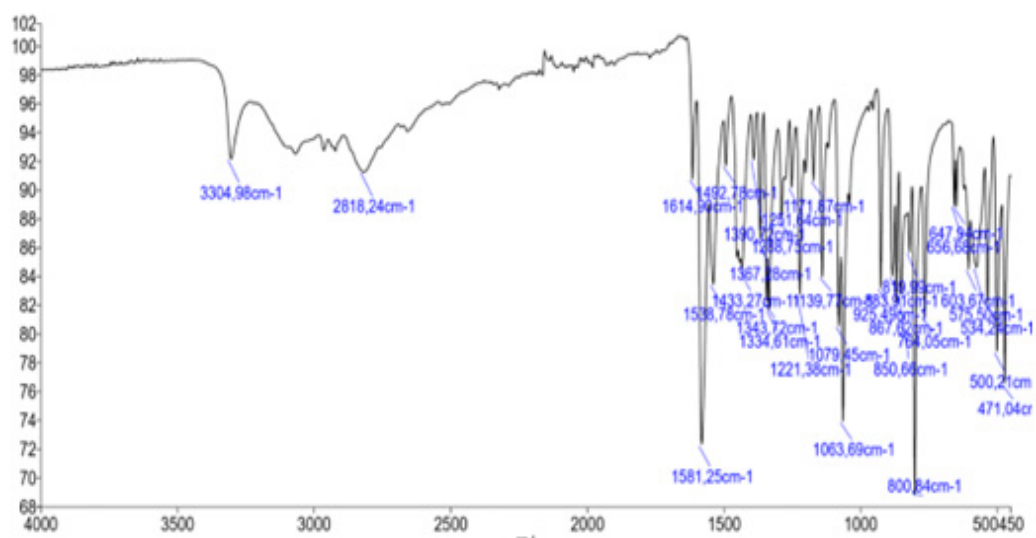

## S2. Comp. 2

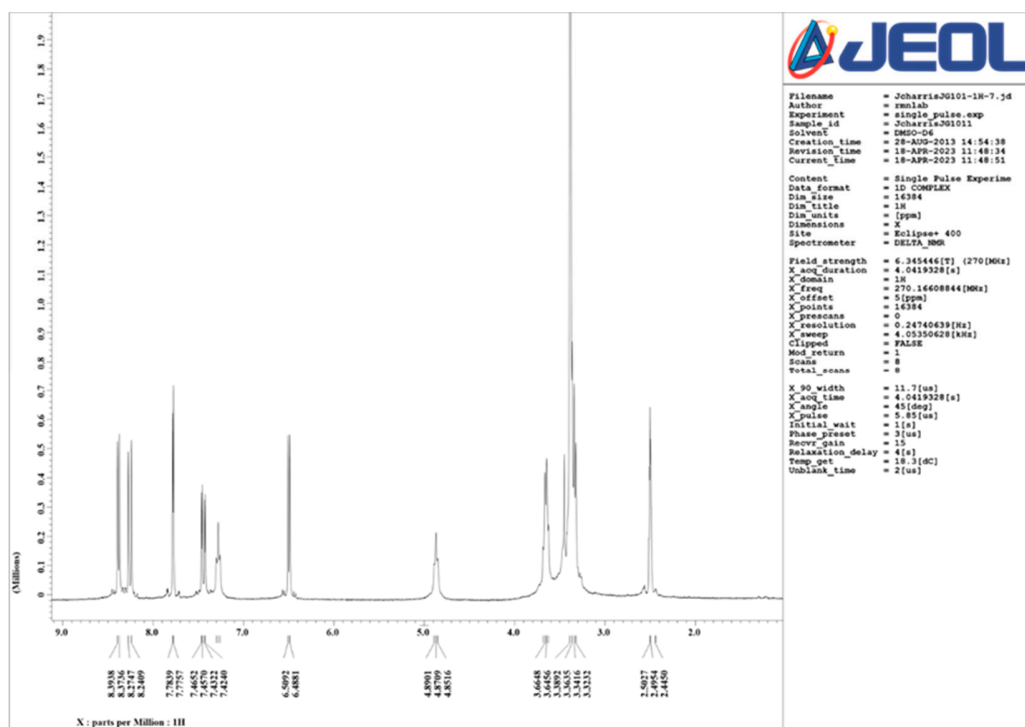



### S3. Comp. 2

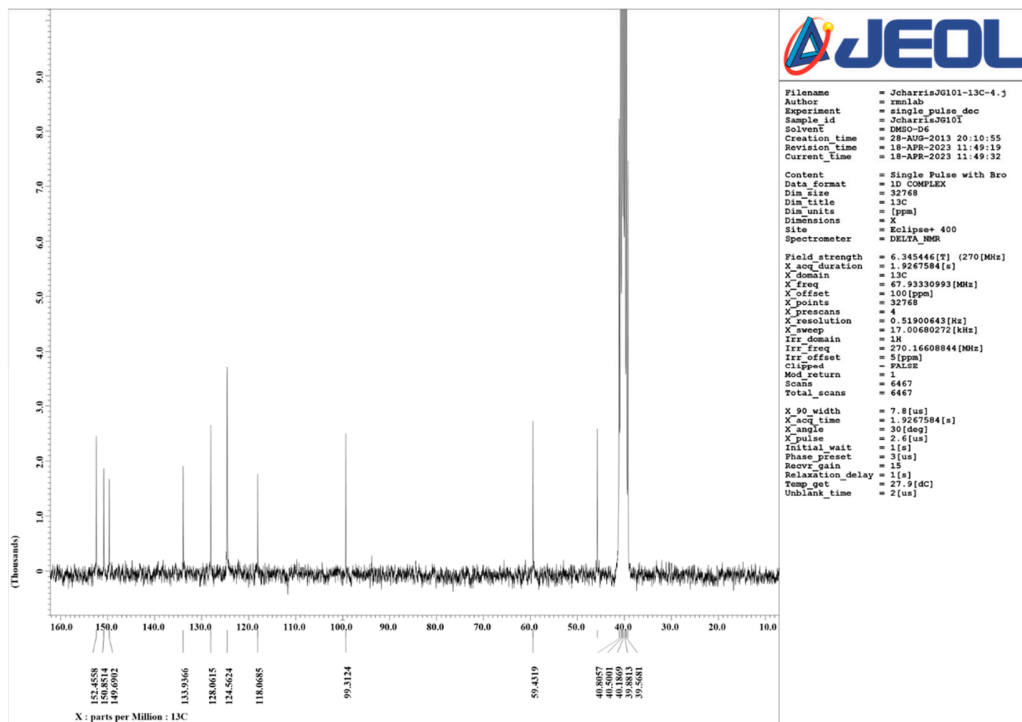

### S4. Comp.2

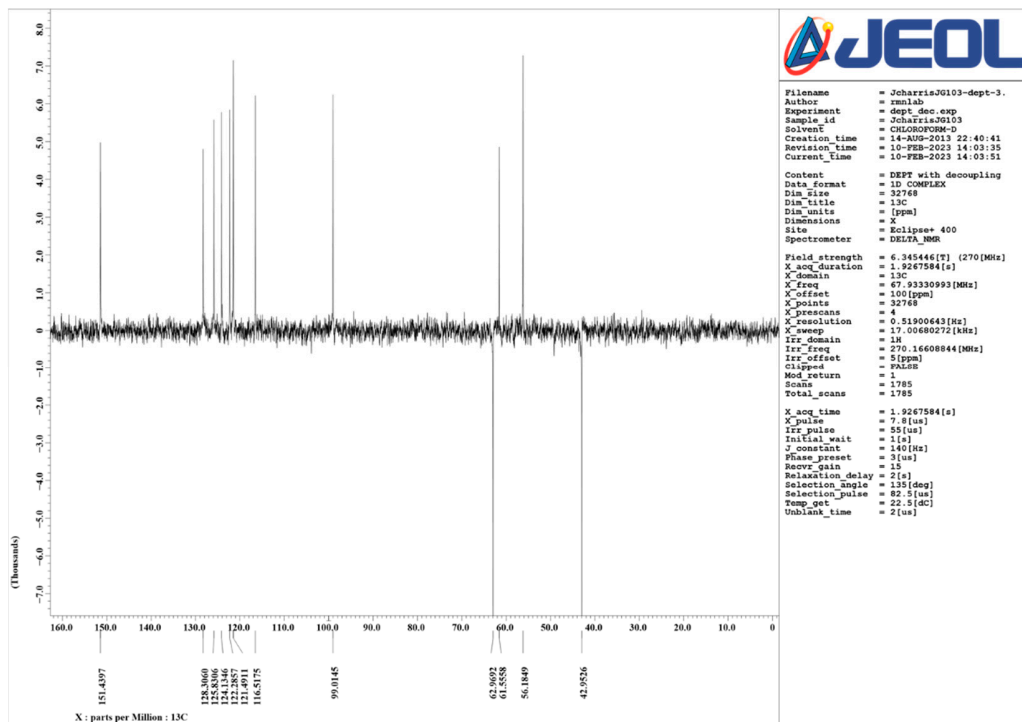

# S5. Comp. 4a

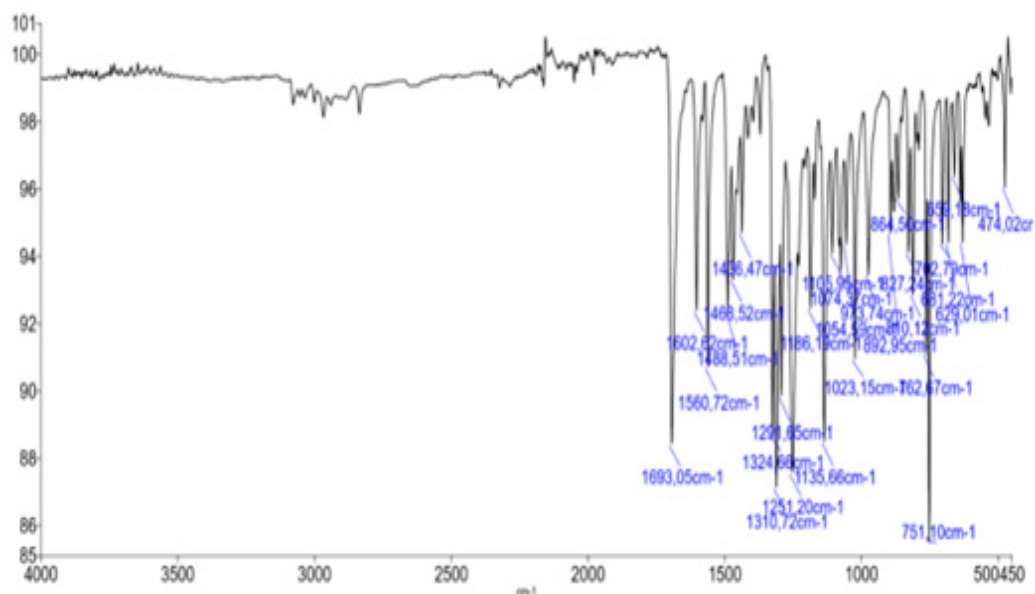

# S6. Comp. 4a

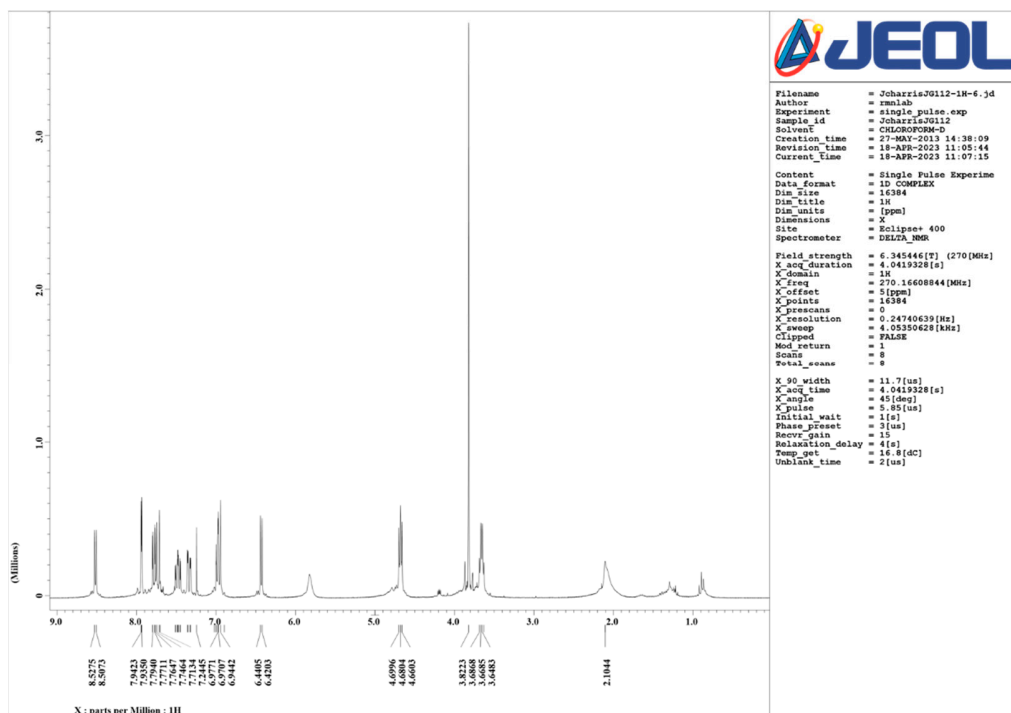

## S7. Comp. 4a

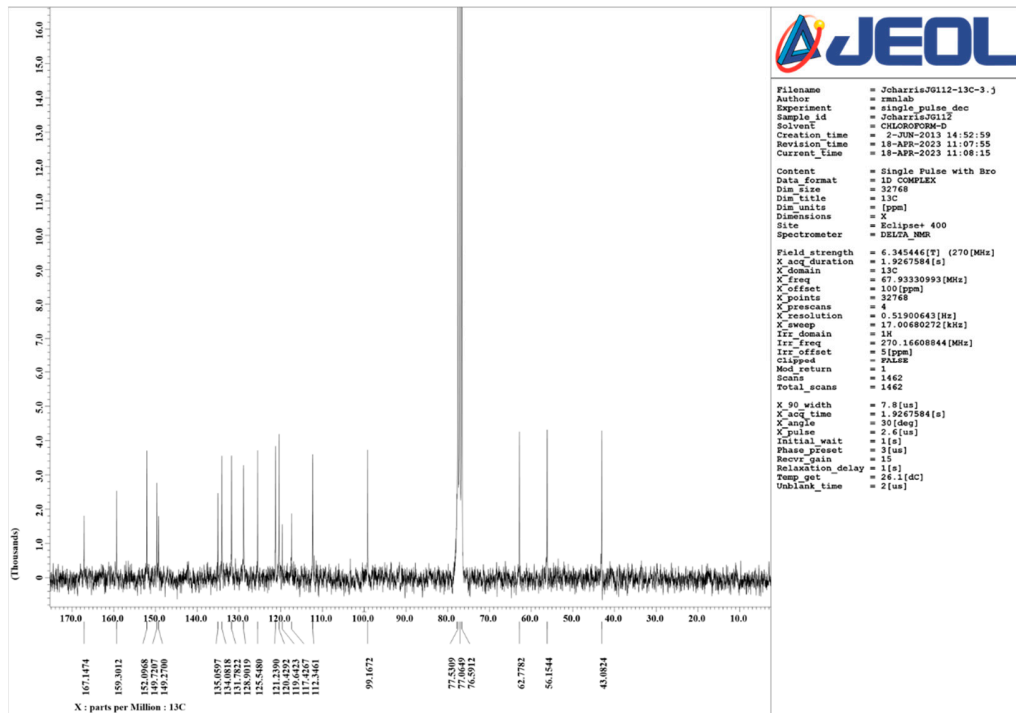

## S8. Comp. 4a

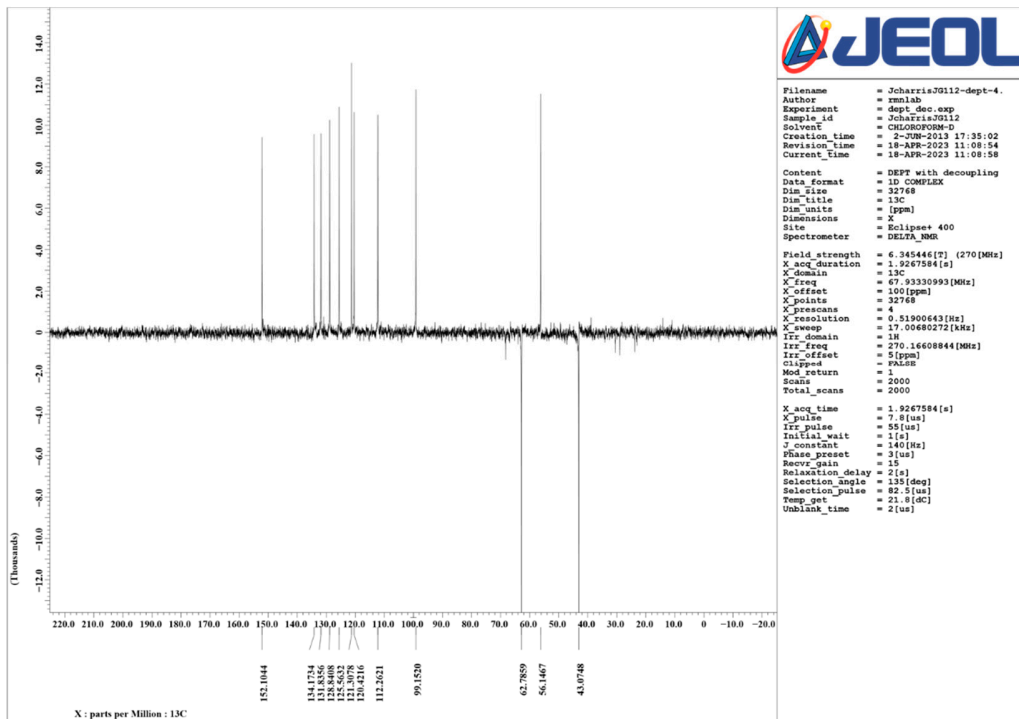

# S9. Comp. 4a

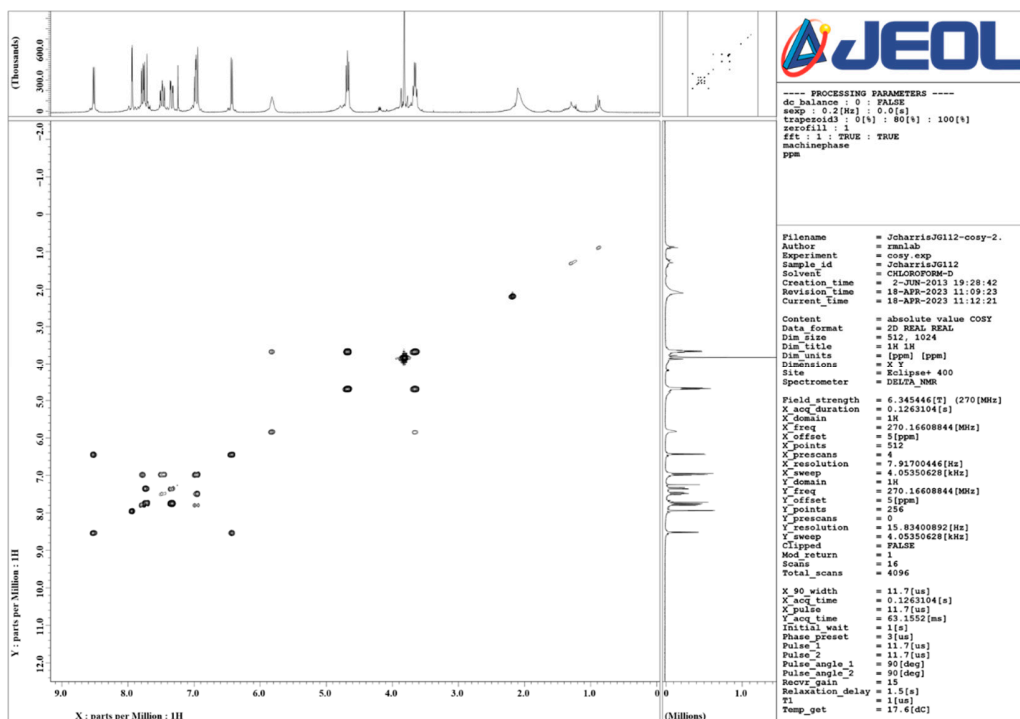

# S10. Comp. 4a

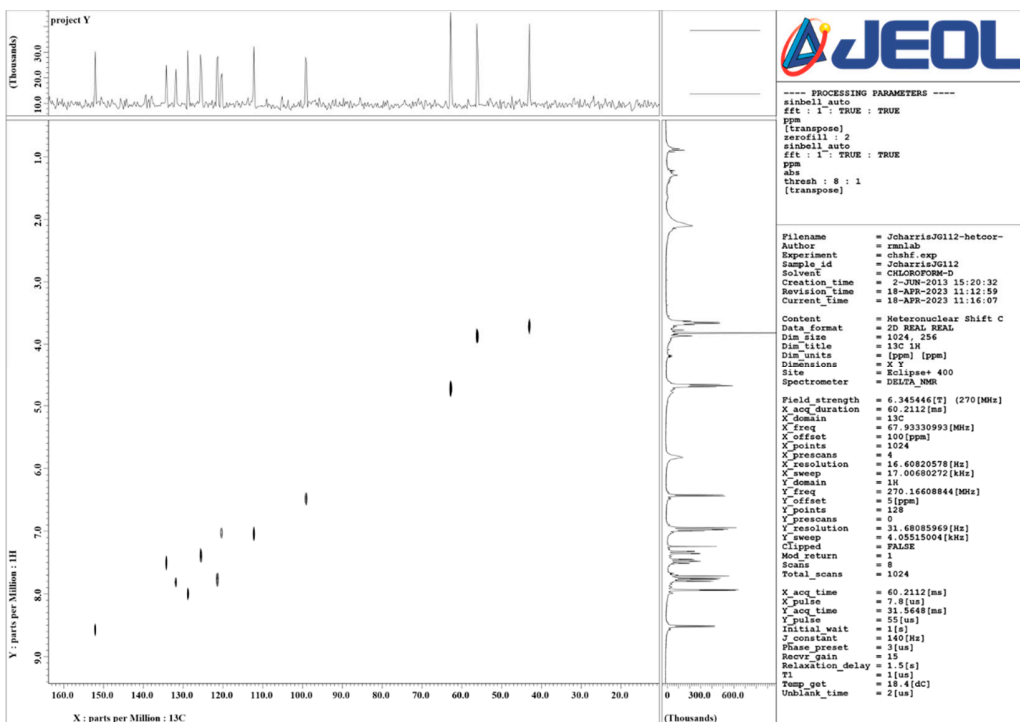

S11. Comp. 4b

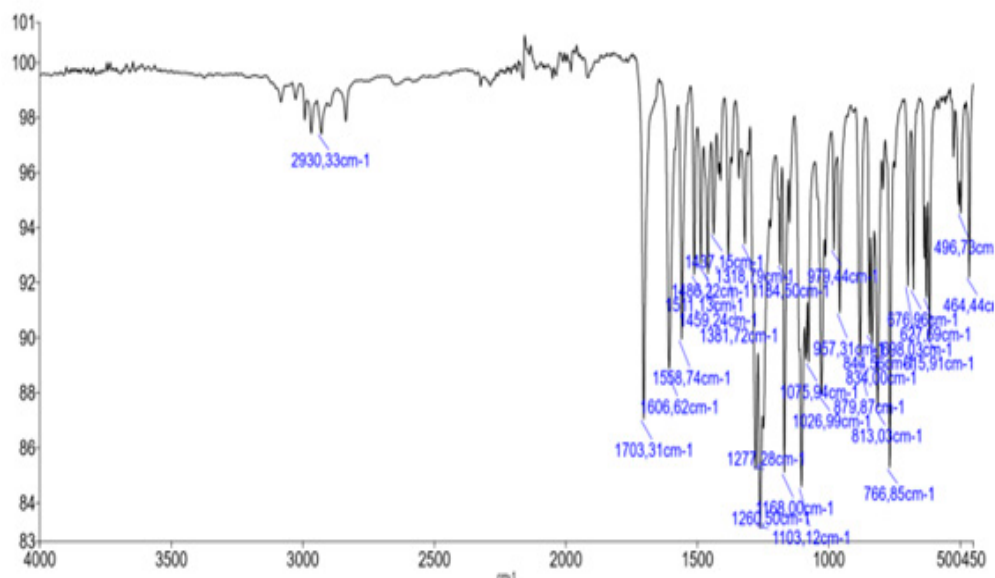

S12. Comp. 4b

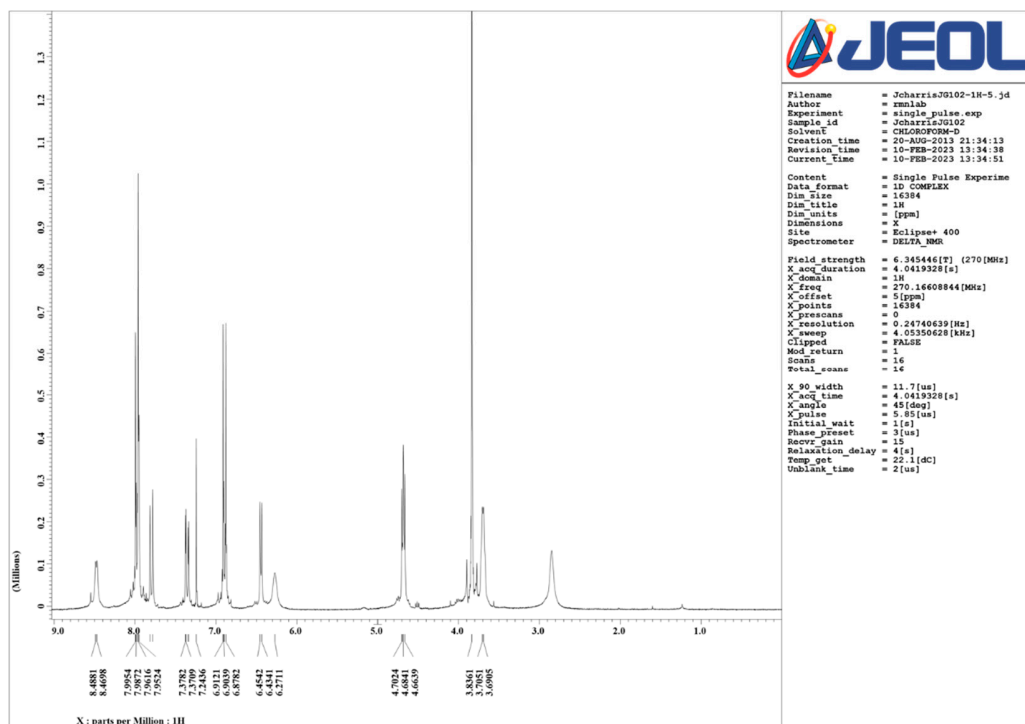

### S13. Comp. 4b

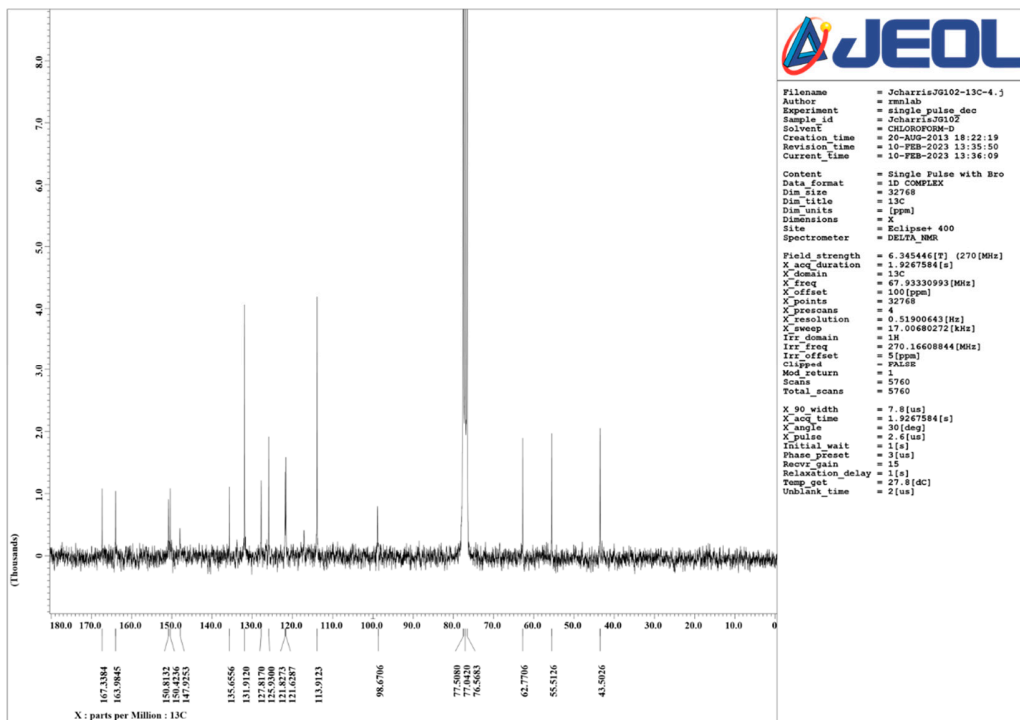

### S14. Comp. 4b

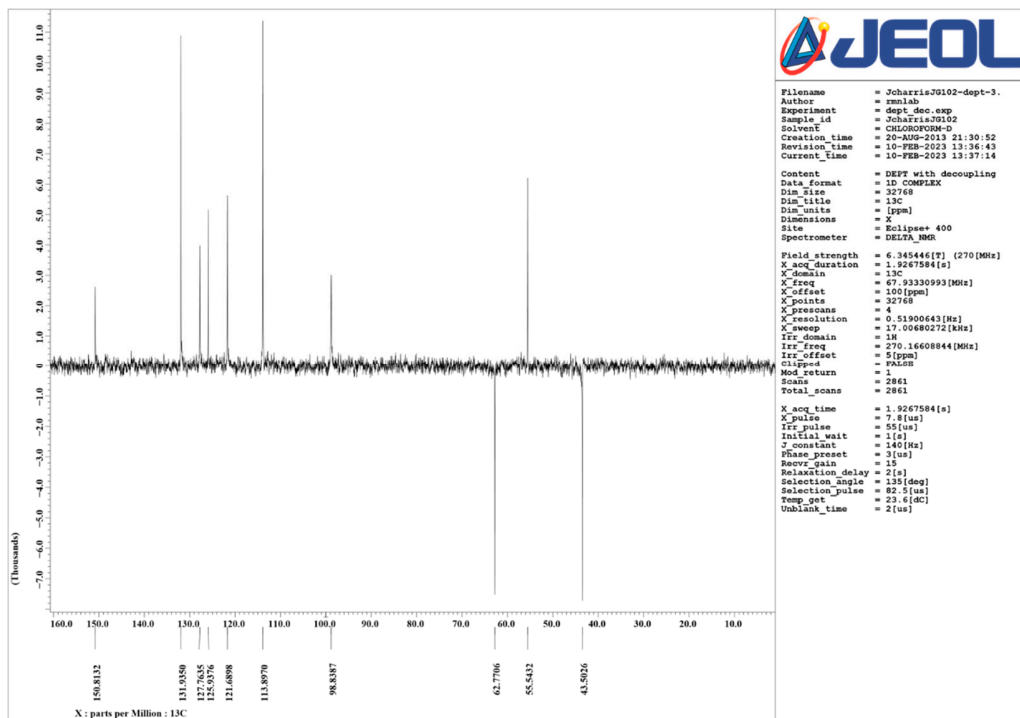

# S15. Comp. 4c

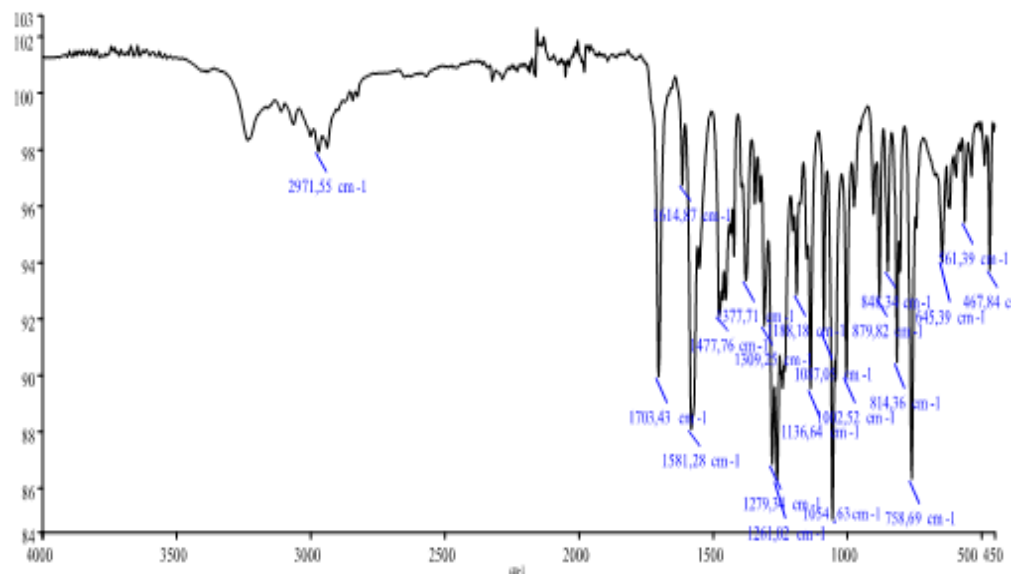

# S16. Comp. 4c

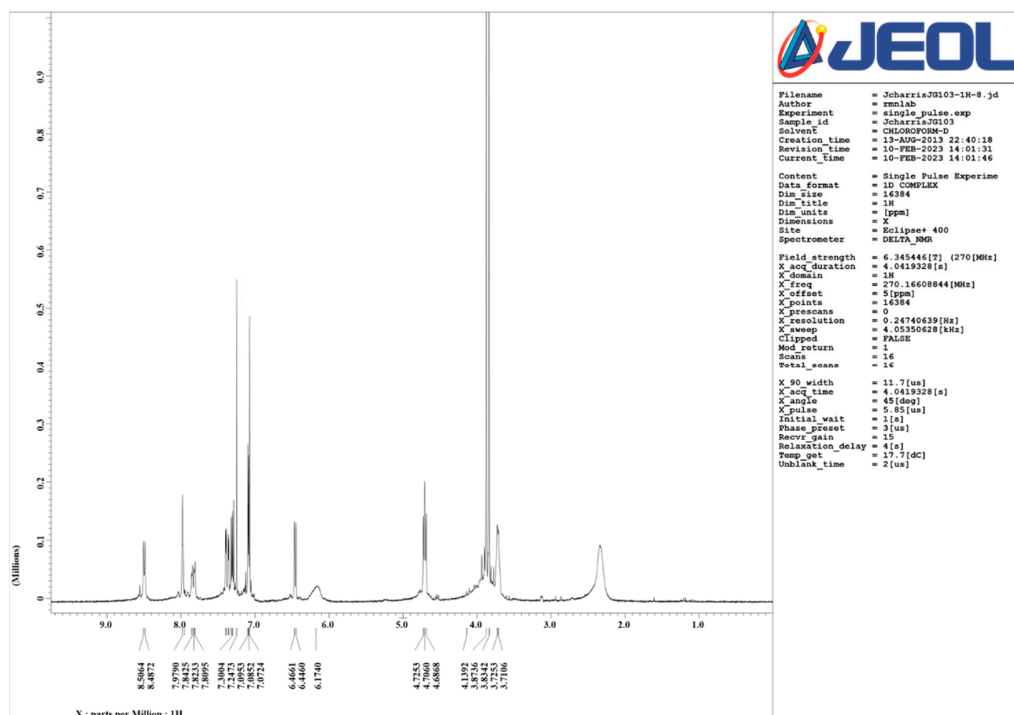

# S17. Comp. 4c

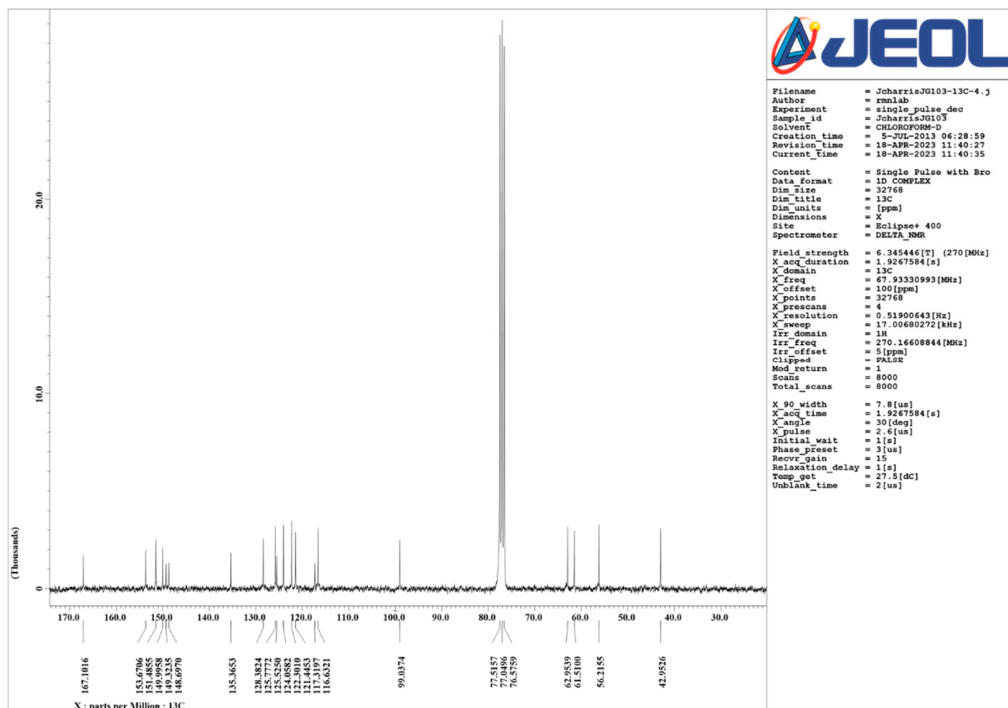

# S18. Comp. 4c

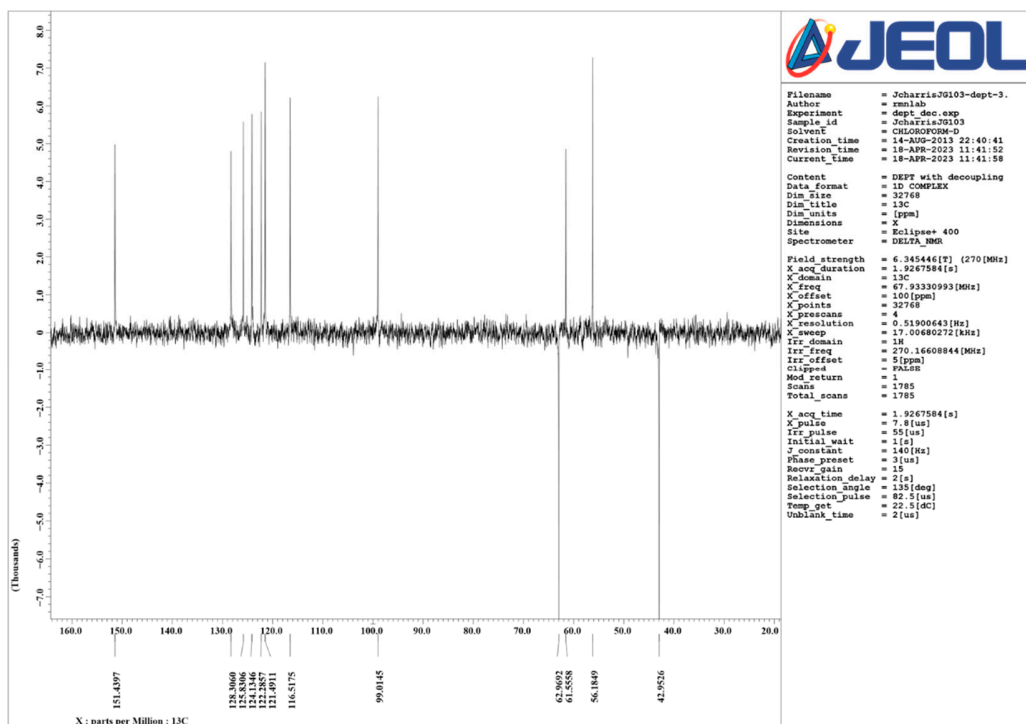



# S19. Comp. 4c

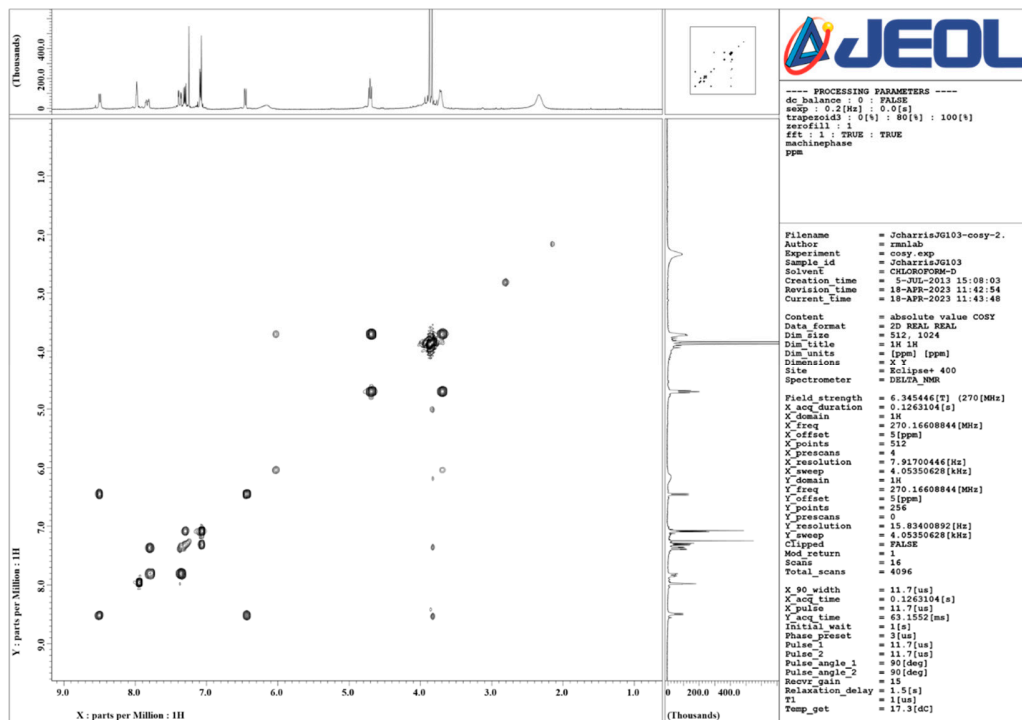

# S20. Comp. 4c

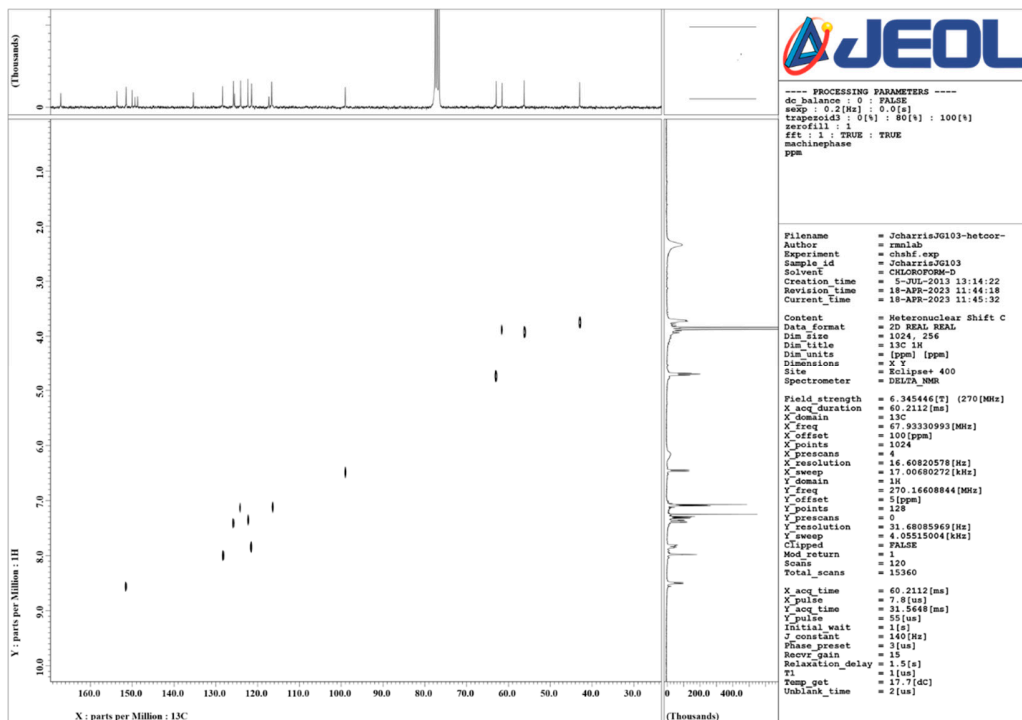

S21. Comp. 4d

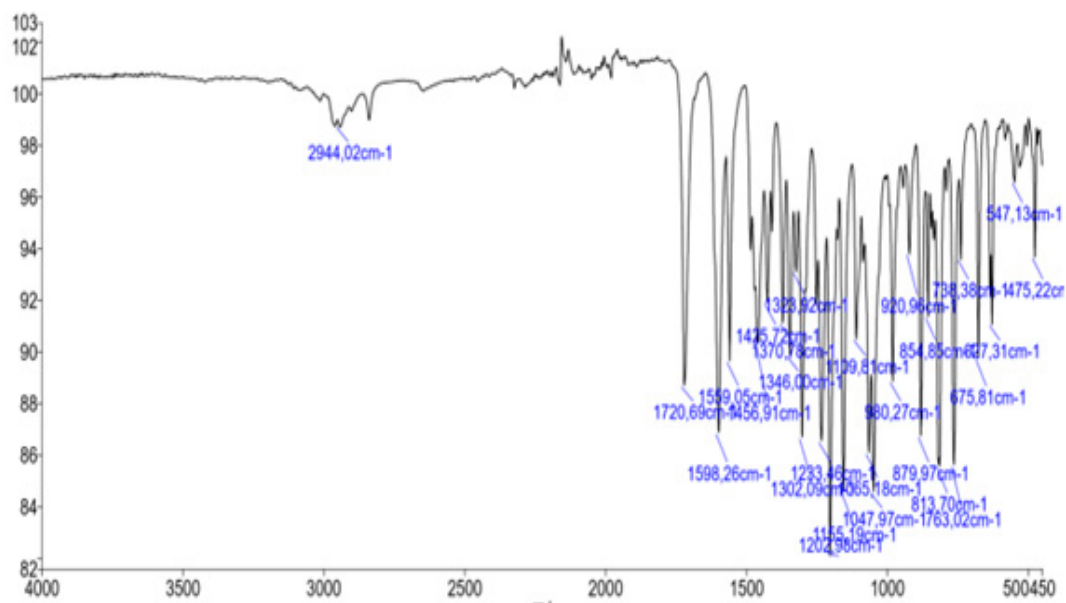

S22. Comp. 4d

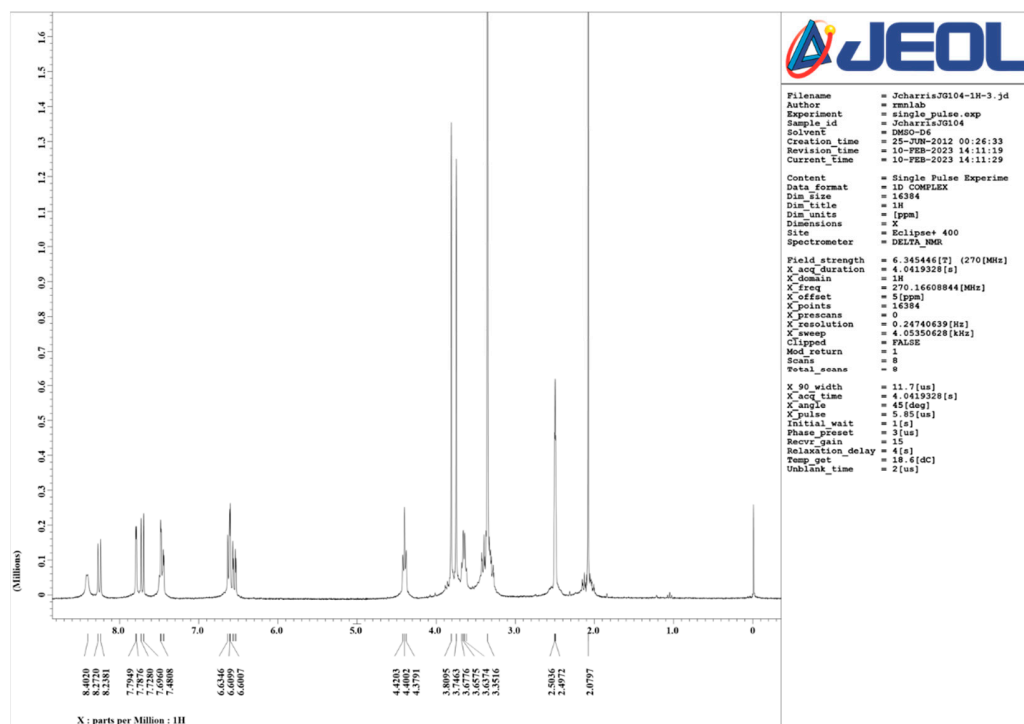

# S23. Comp. 4d

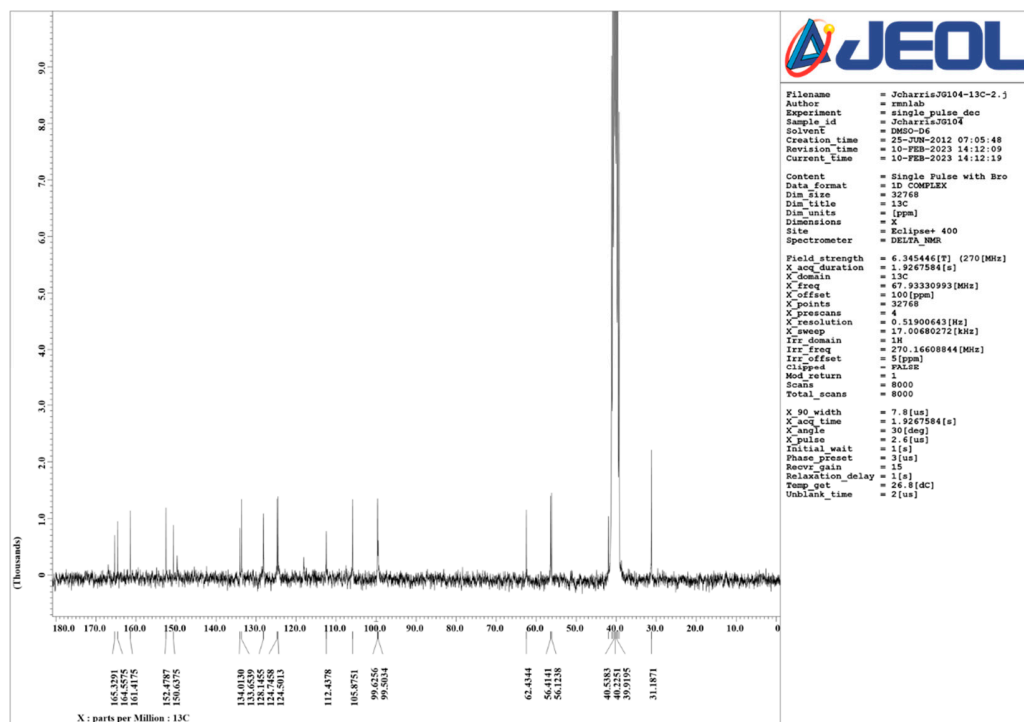

# S24. Comp. 4e

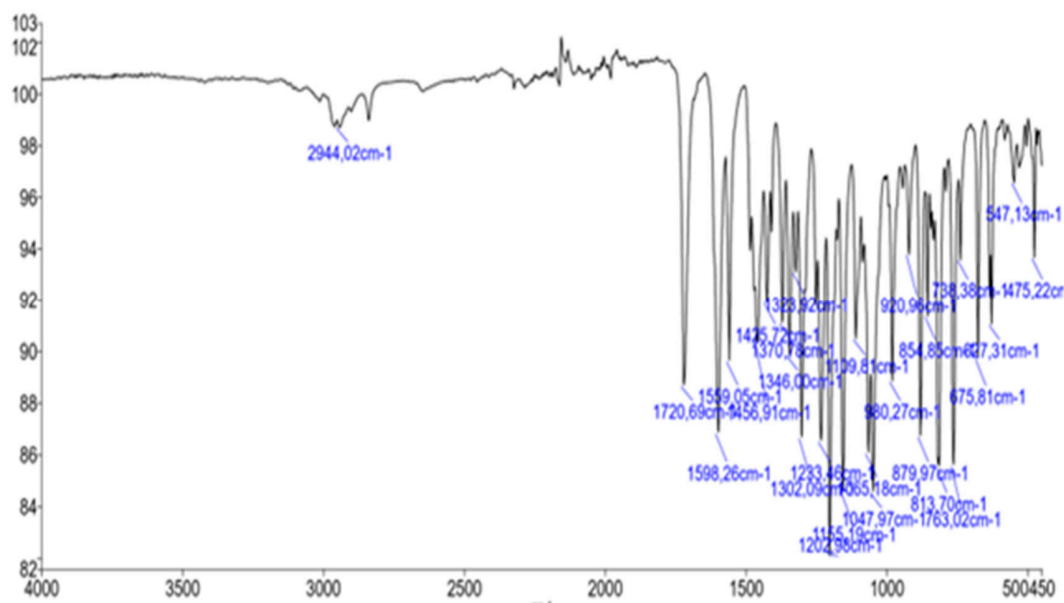

# S25. Comp. 4e

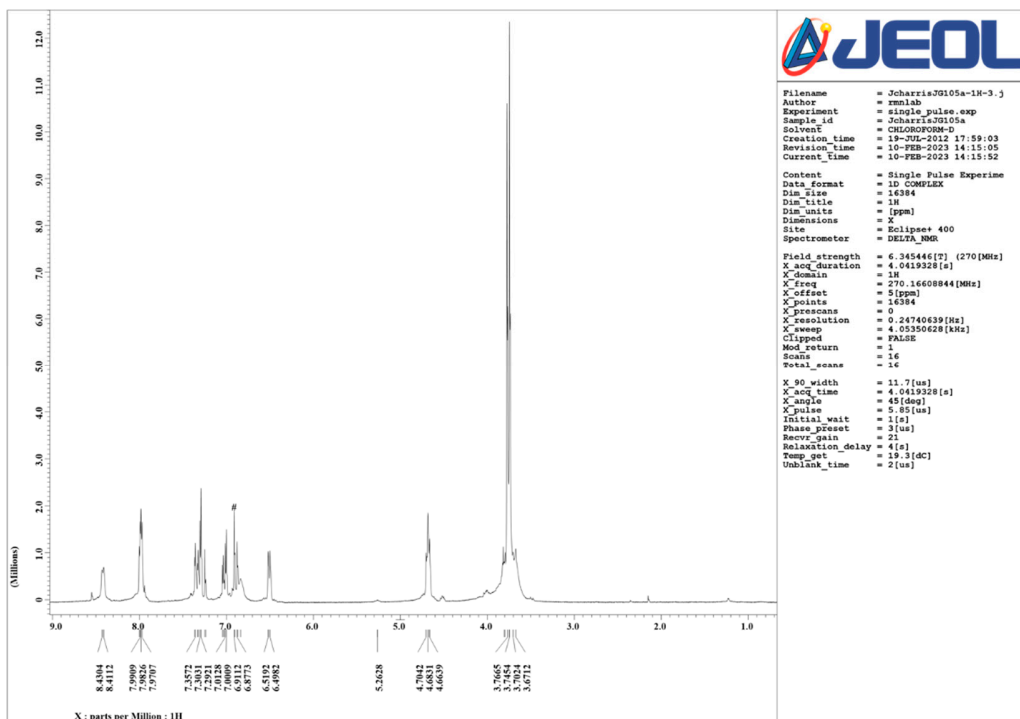

## S26. Comp. 4e

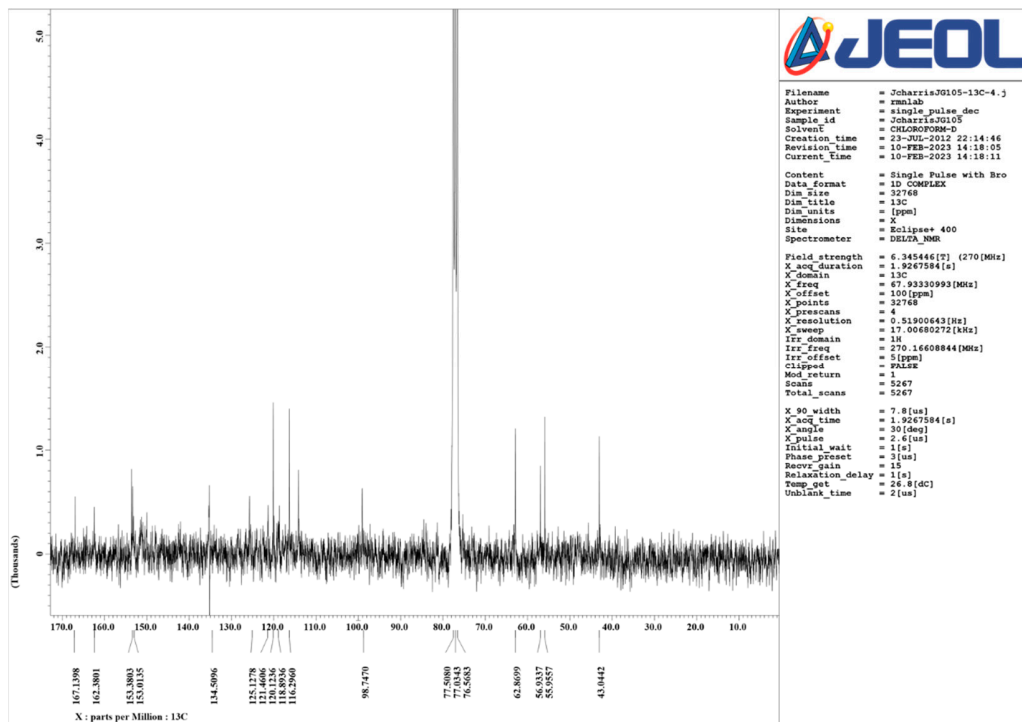

## S27. Comp. 4e

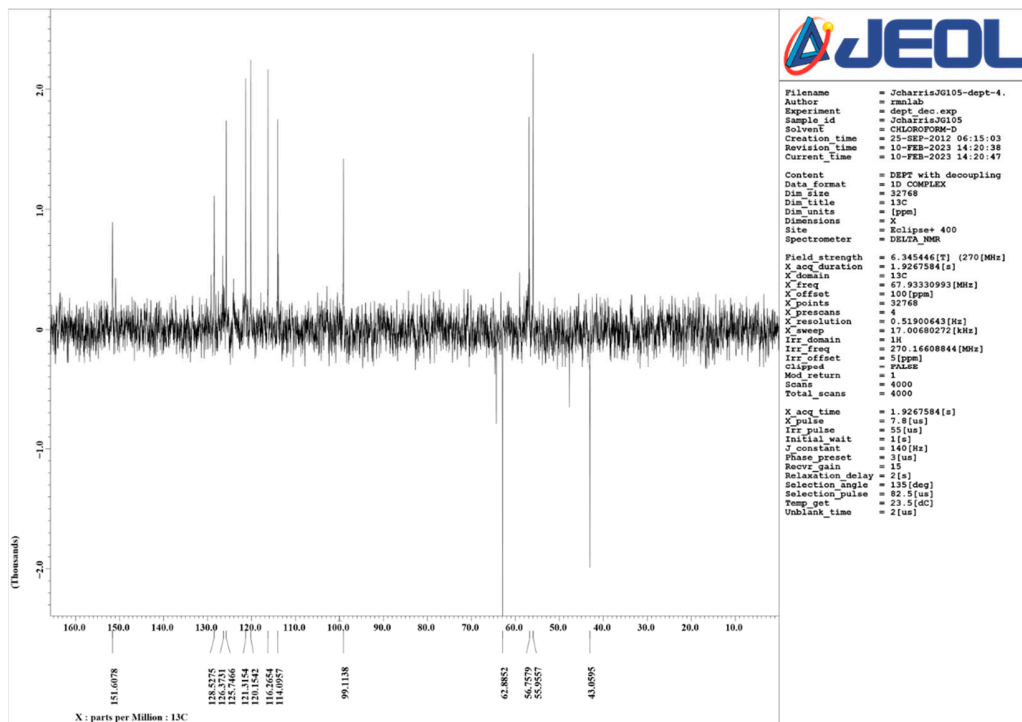

S28. Comp. 4f

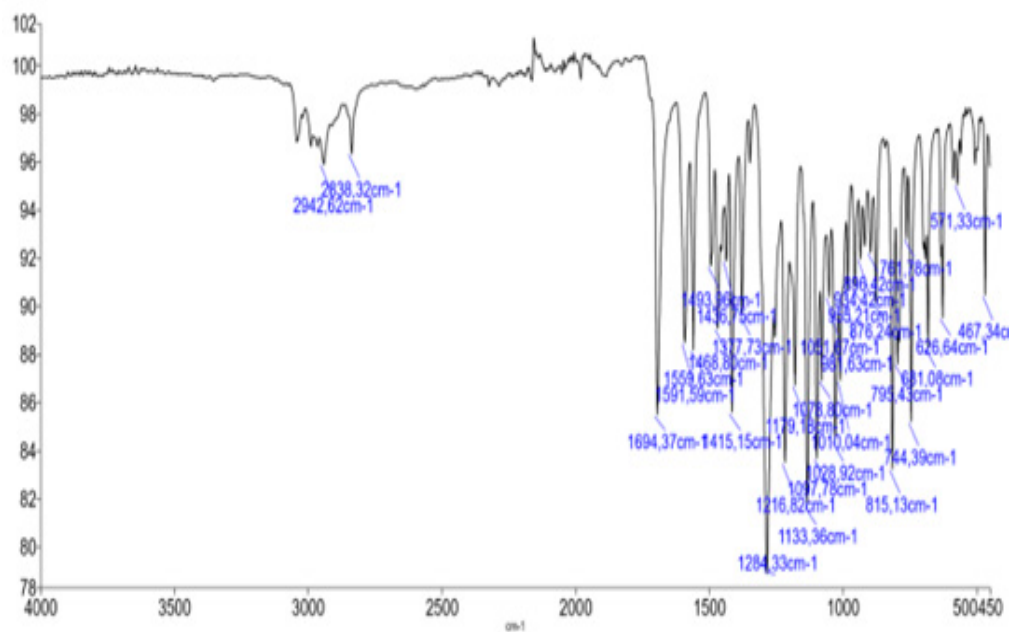

S29. Comp. 4f

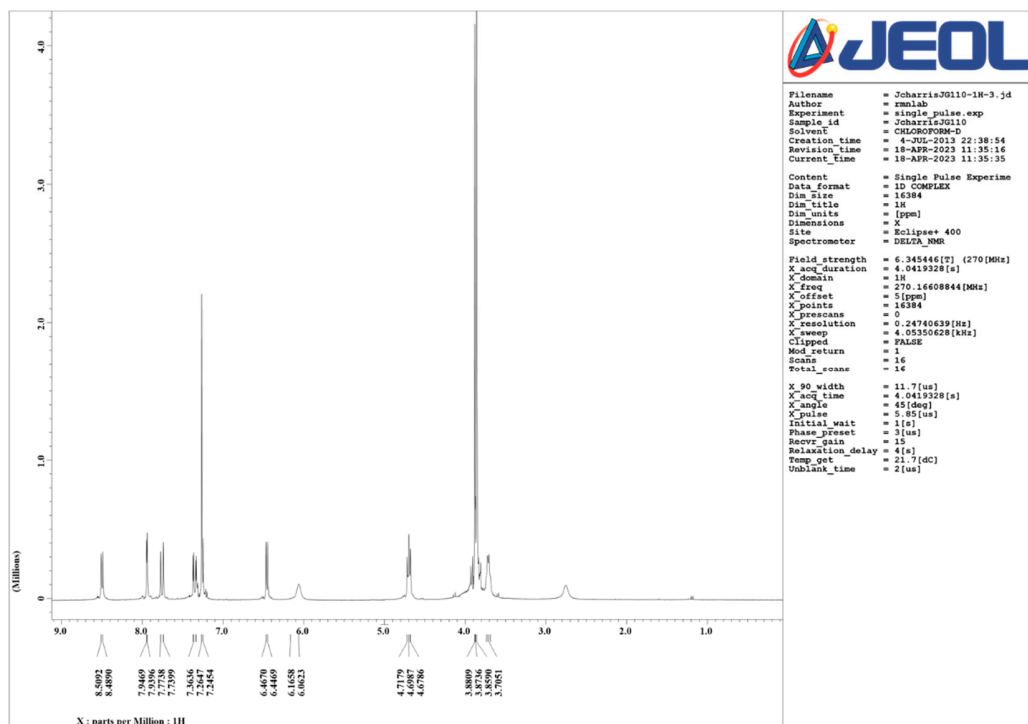

### S30. Comp. 4f

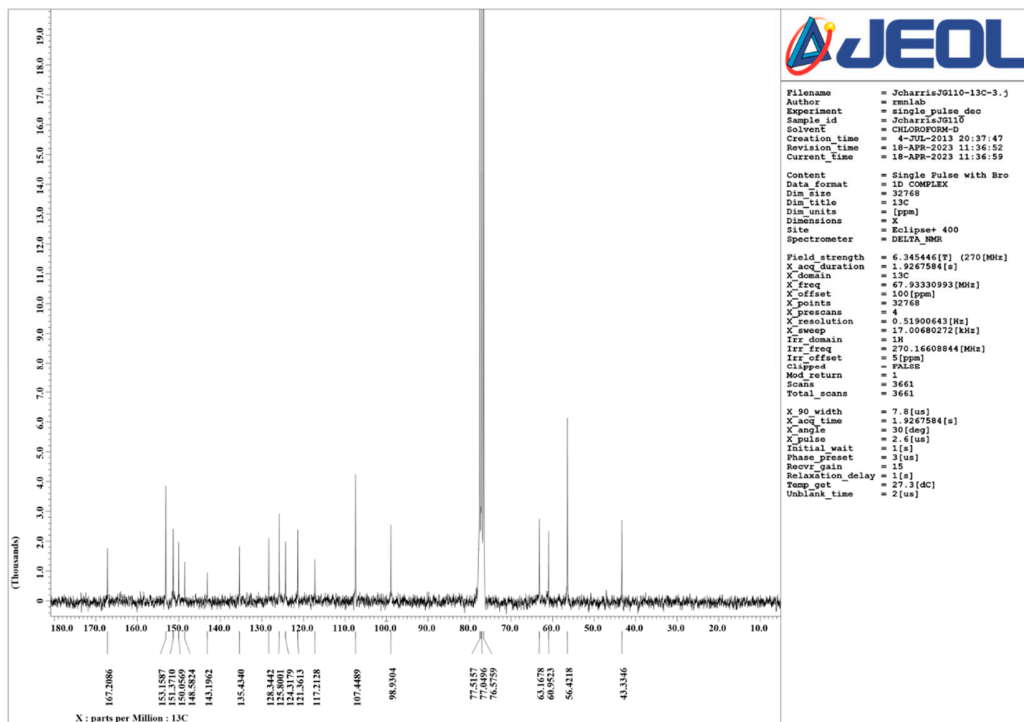

### S31. Comp. 4f

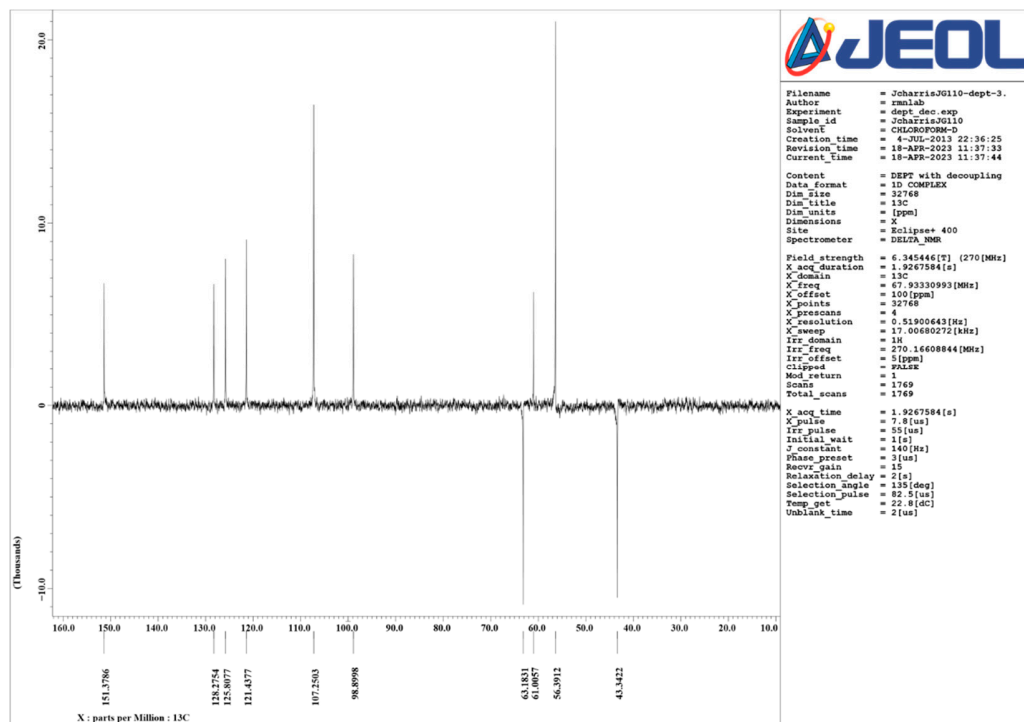

# S32. Comp. 4f

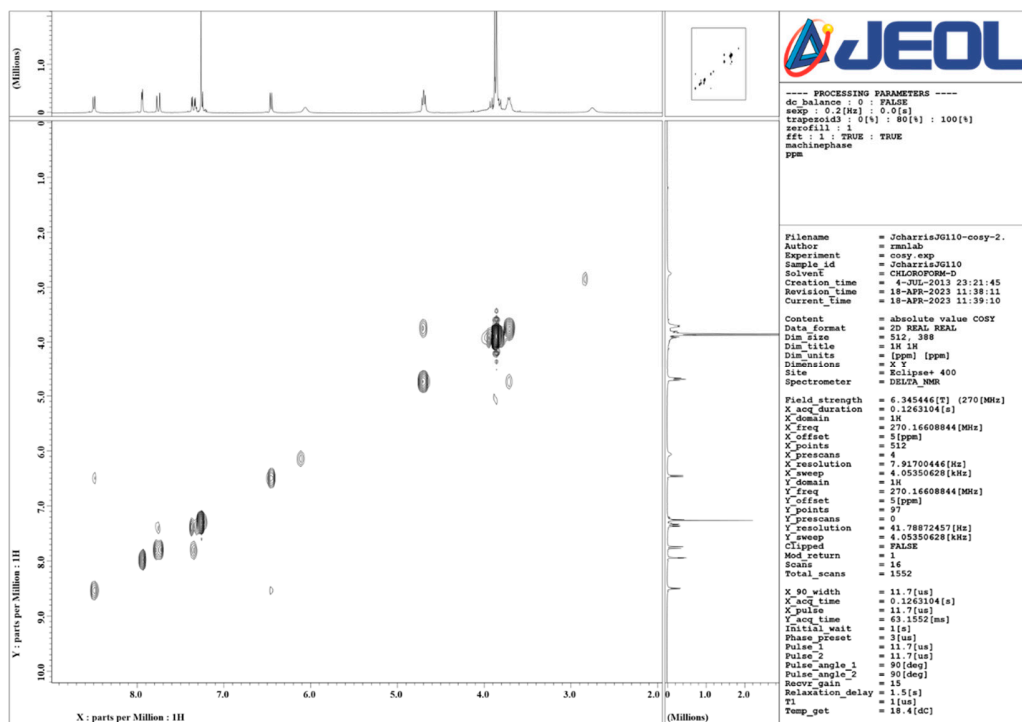



S33. Comp. 4g

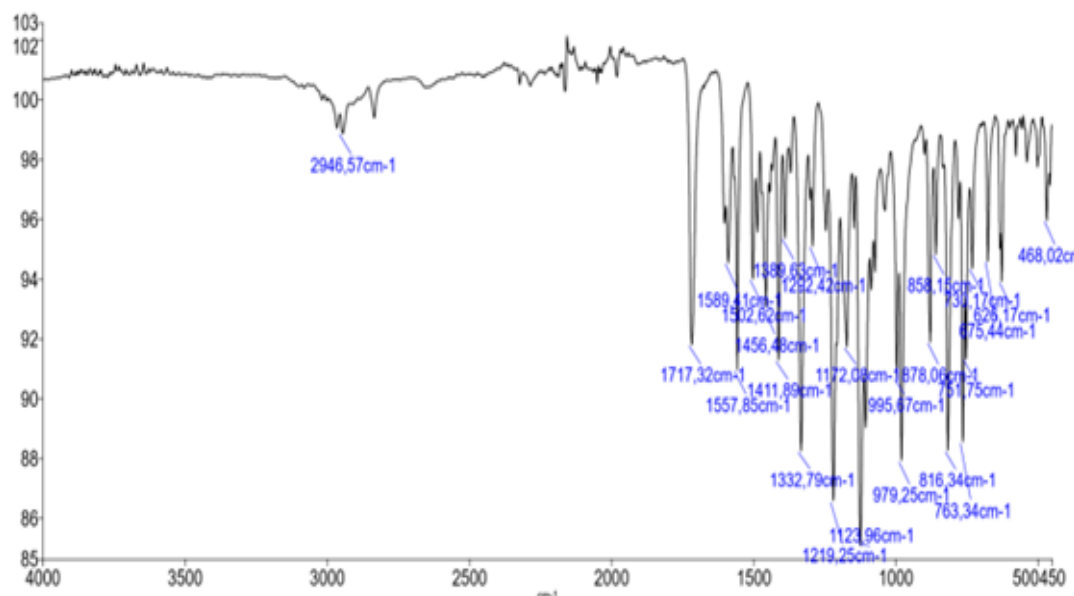

S34. Comp. 4g

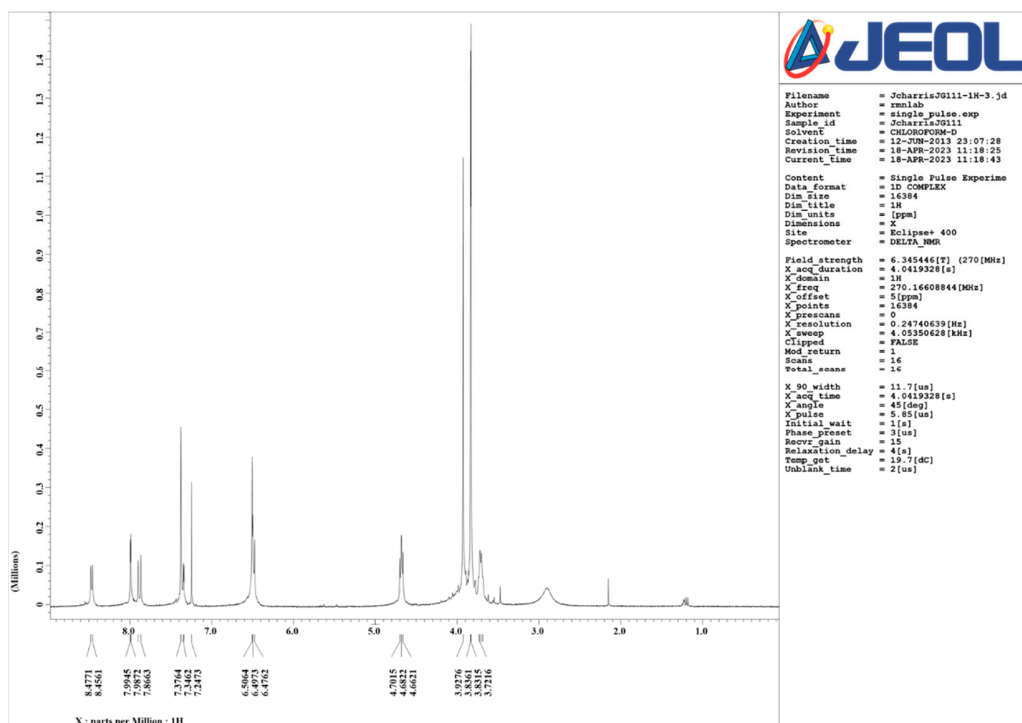

### S35. Comp. 4g

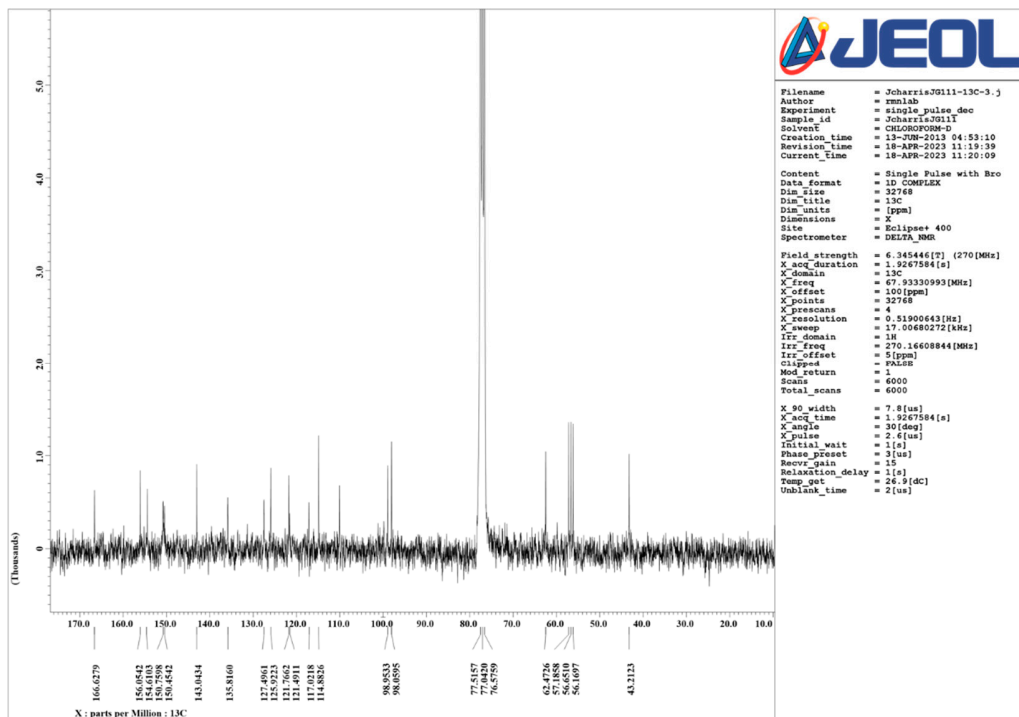

### S36. Comp. 4g

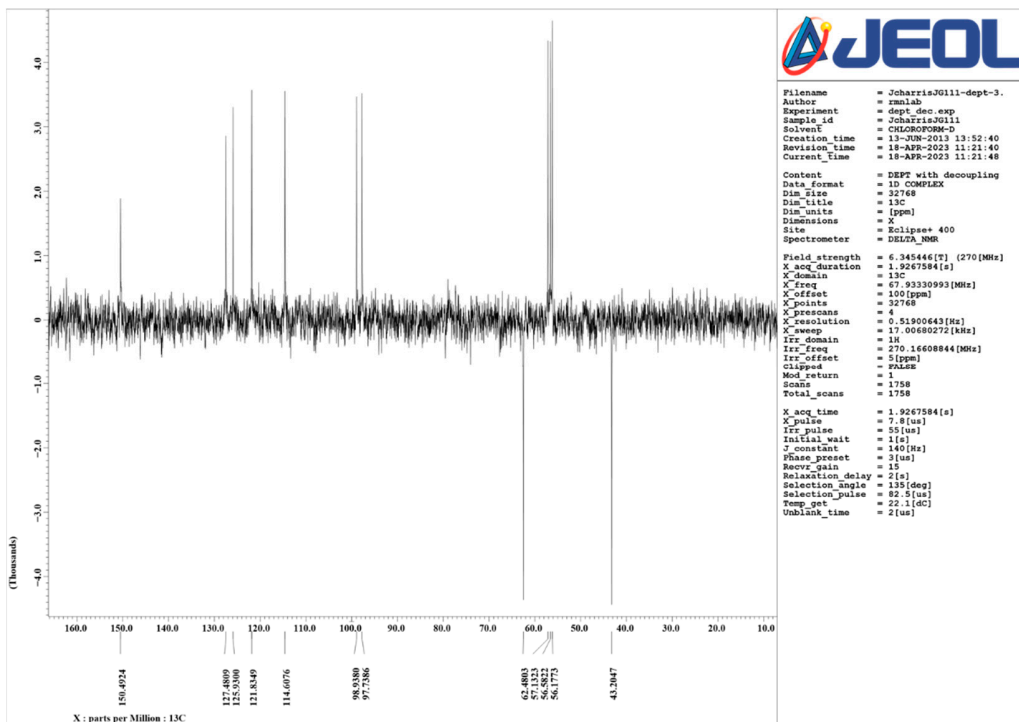

### S37. Comp. 4g

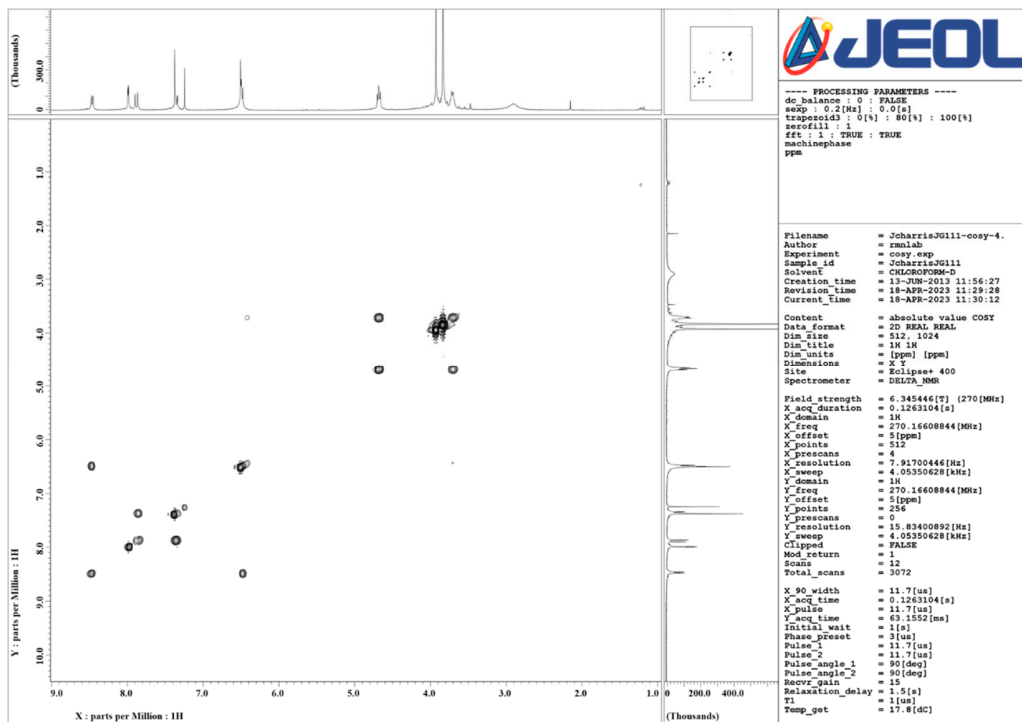

### S38. Comp. 4g

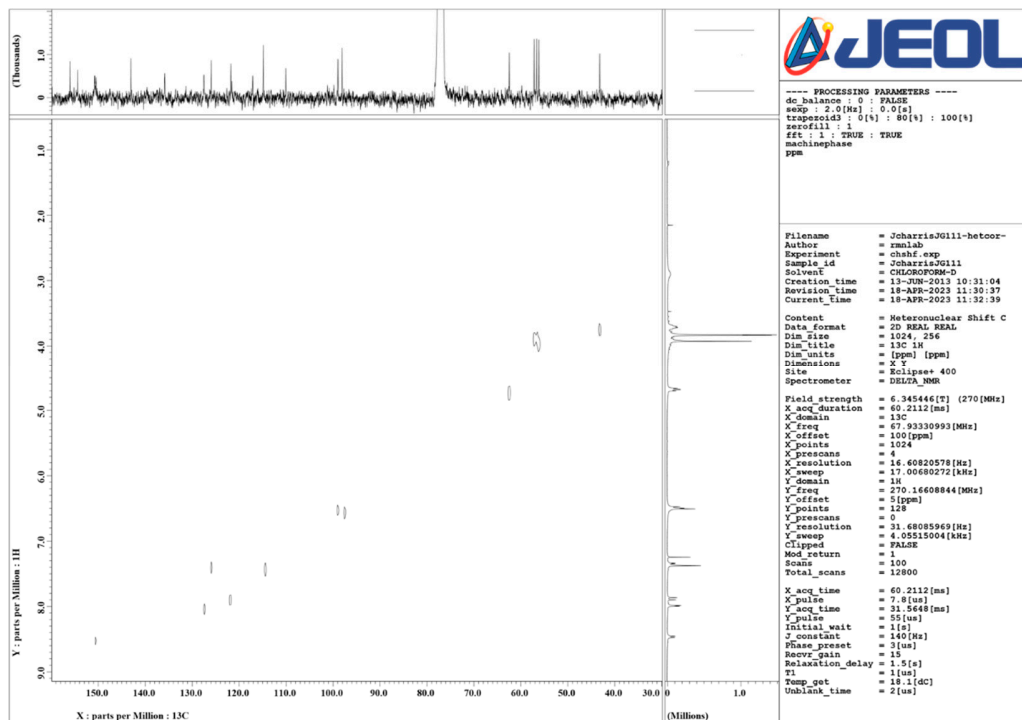

S39. Comp. 4h

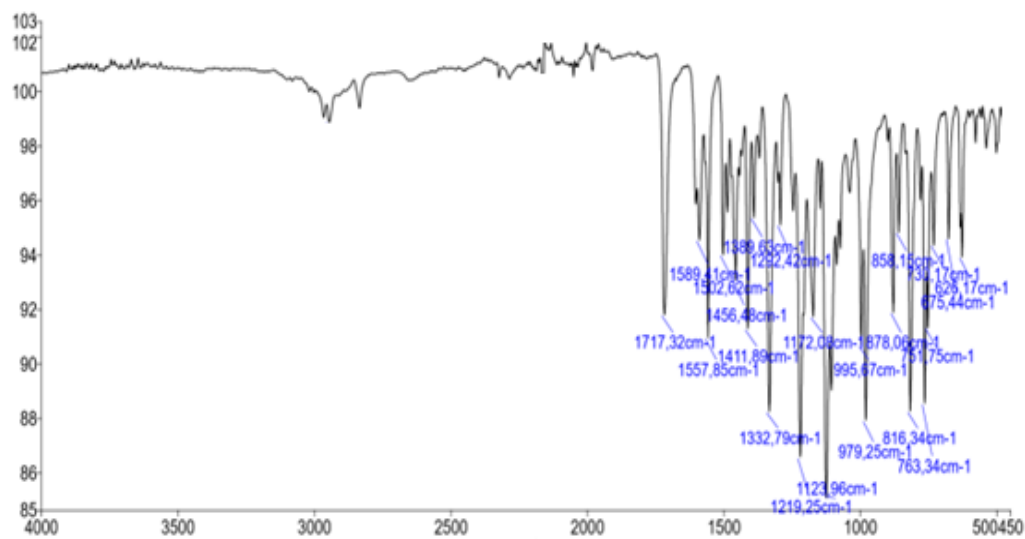

S40. Comp. 4h

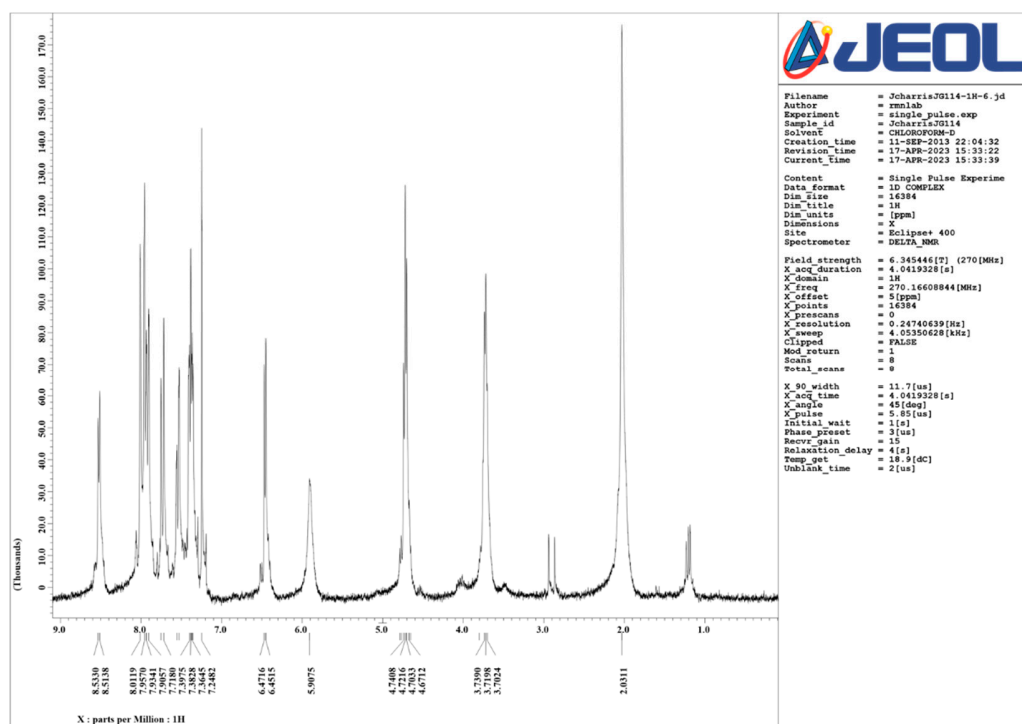

## S41. Comp. 4h

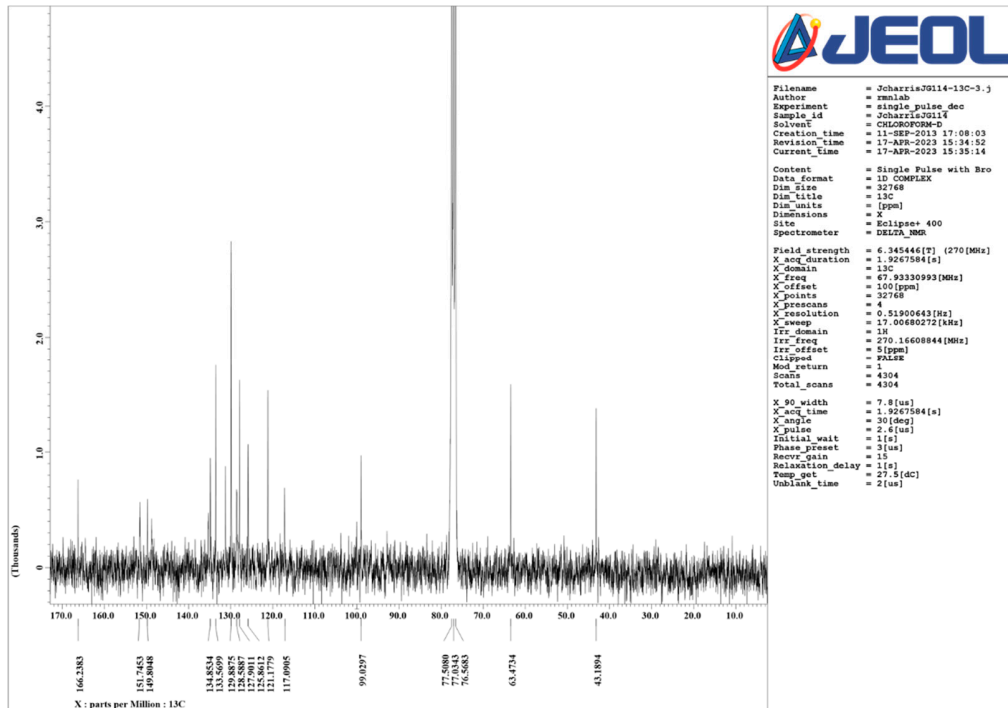

## S42. Comp. 4h

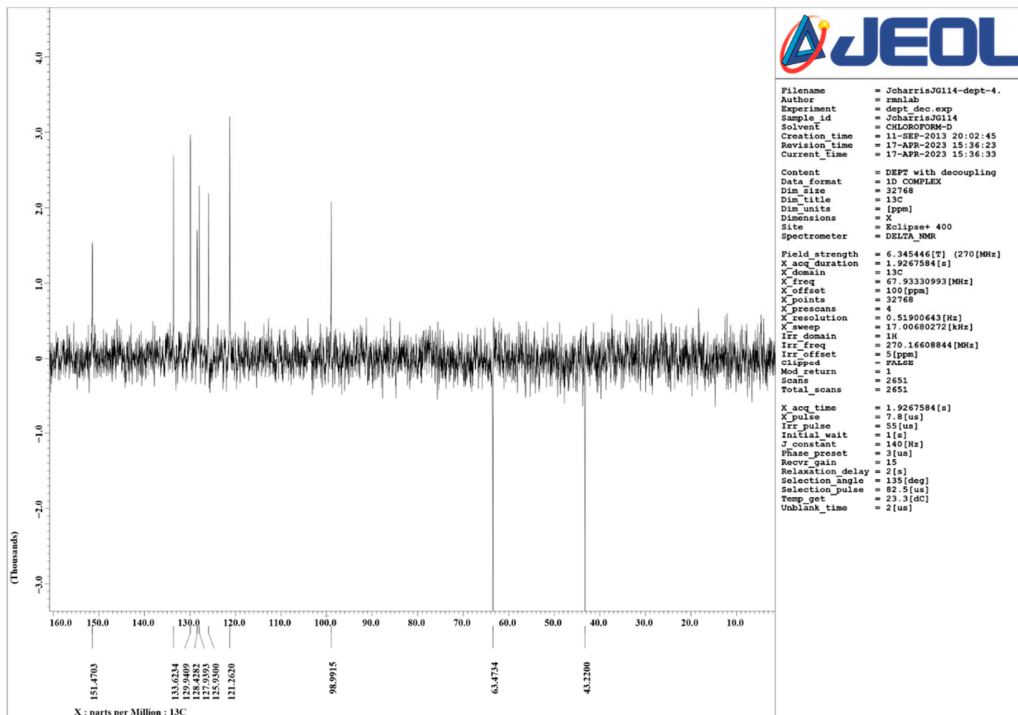

S43. Comp. 4h

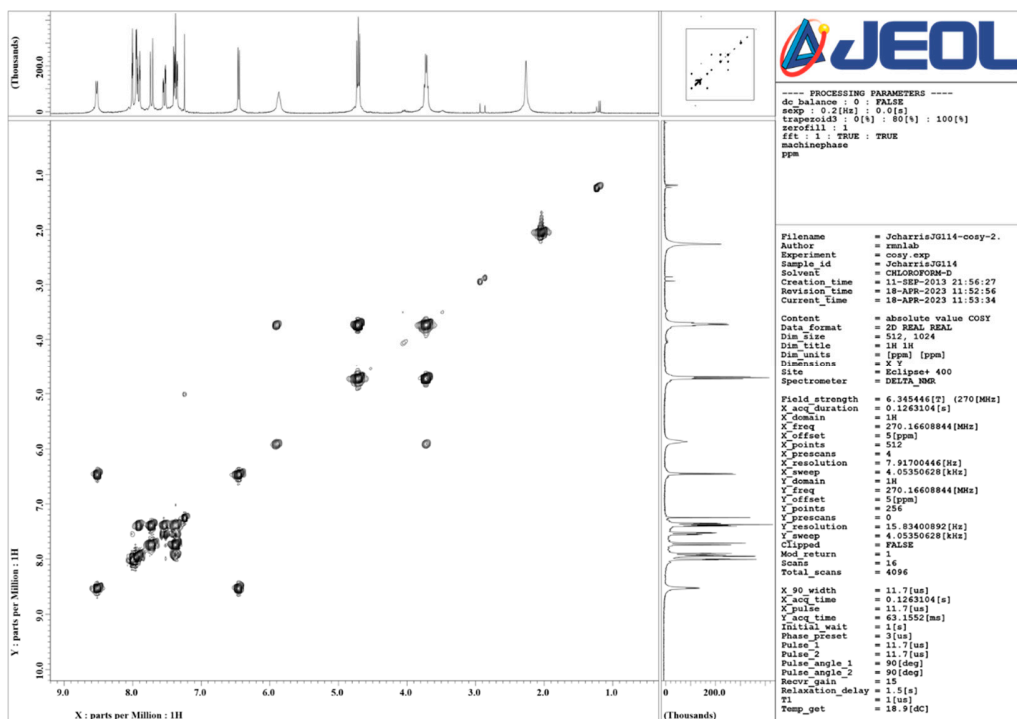

S44. Comp. 4i

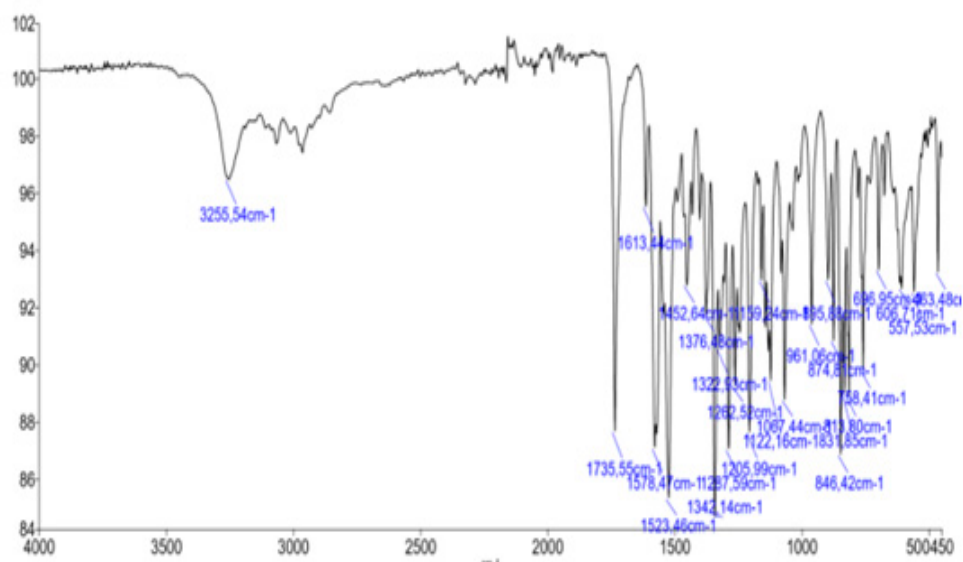

S45. Comp. 4i

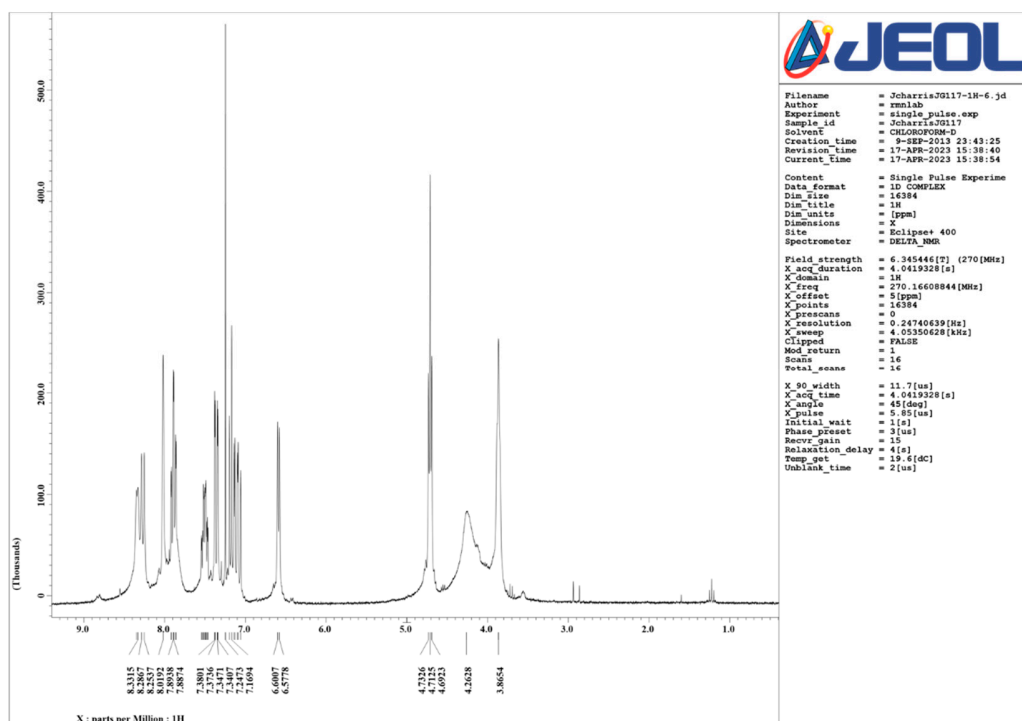

# S46. Comp. 4i

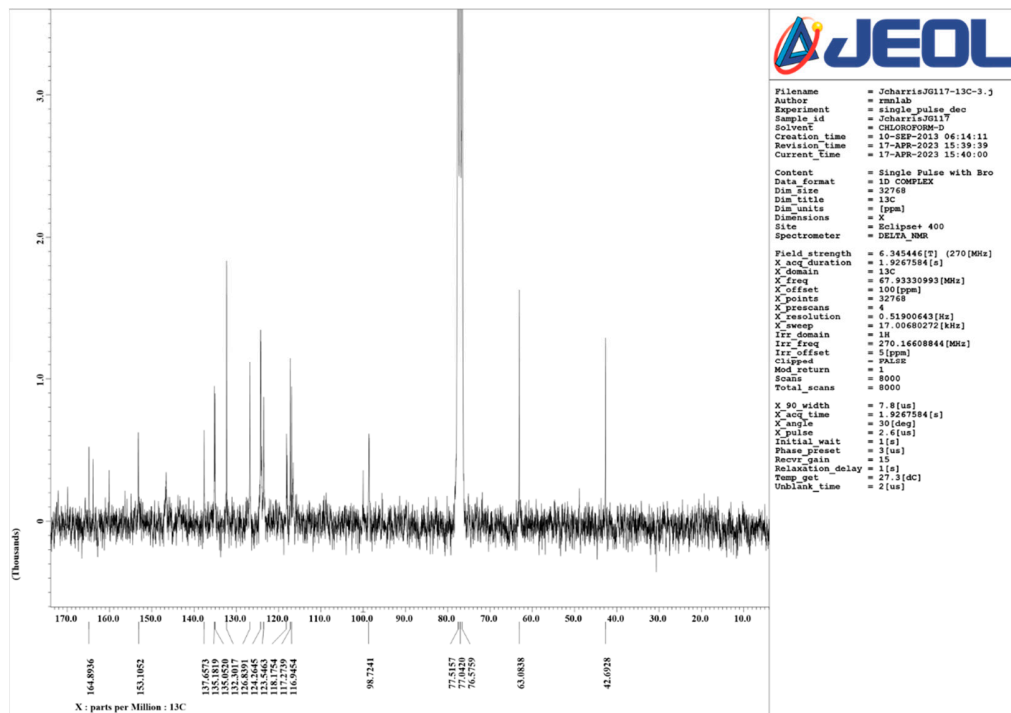

# S47. Comp. 4i

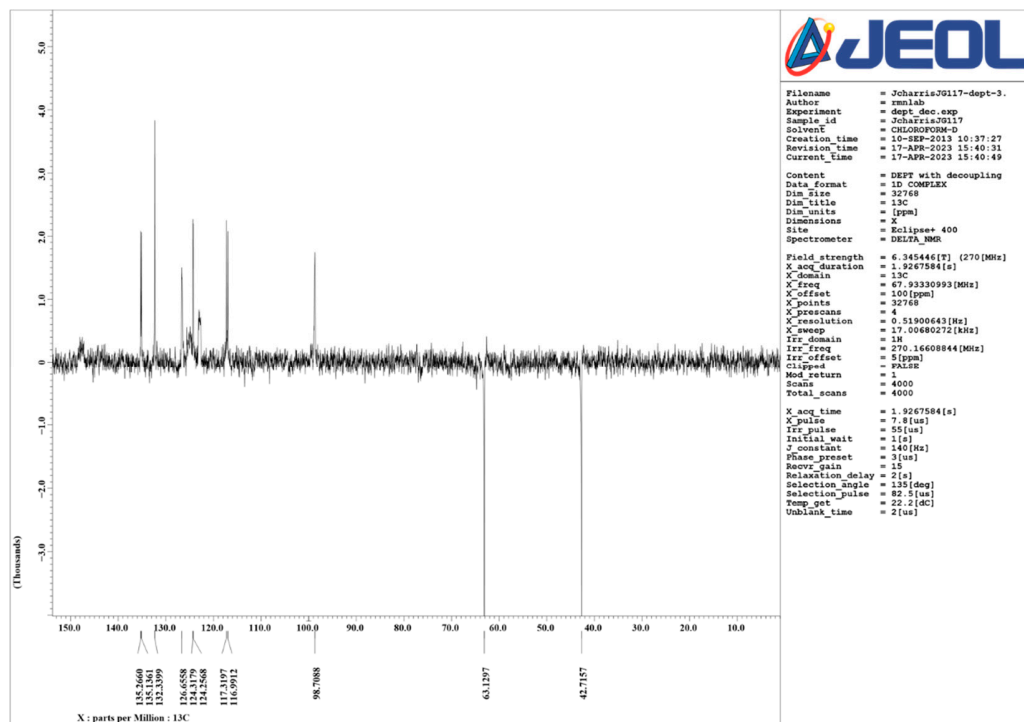



S48. Comp. 4i

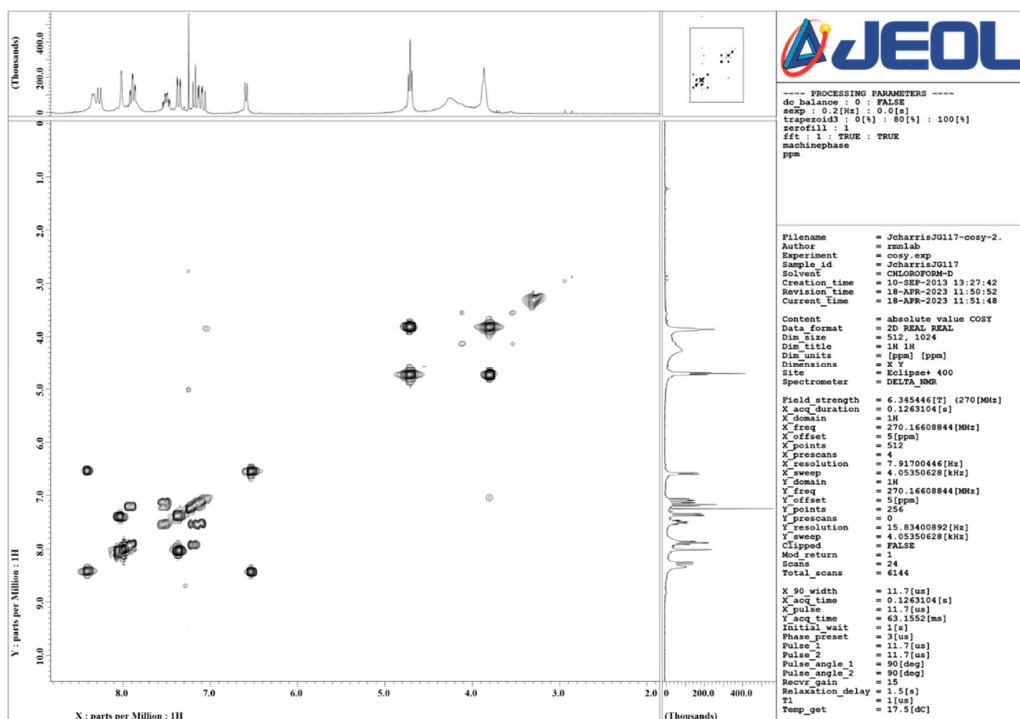

S49. Comp. 4j

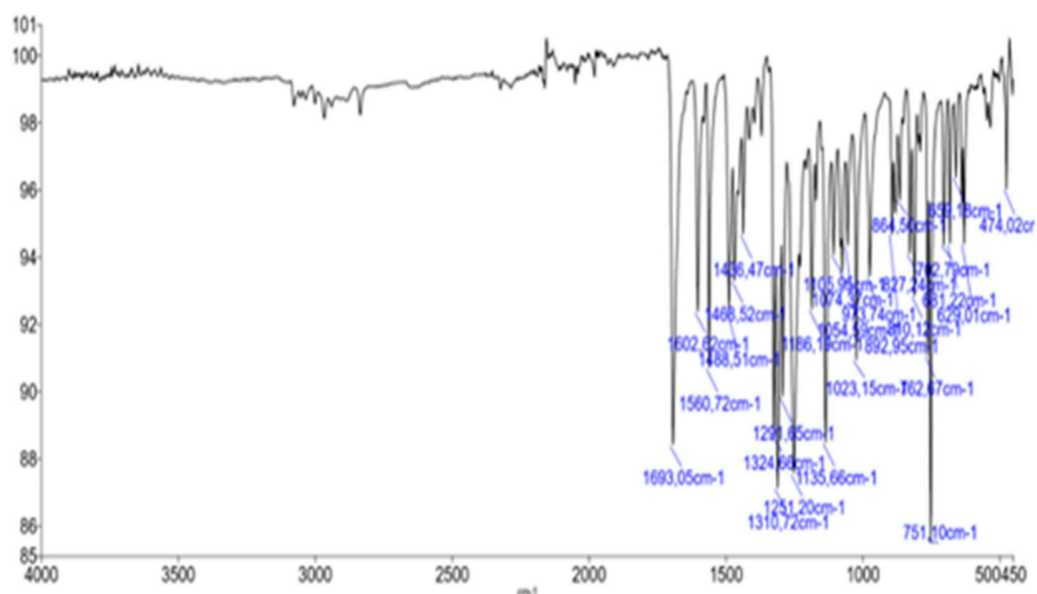

S50. Comp. 4j

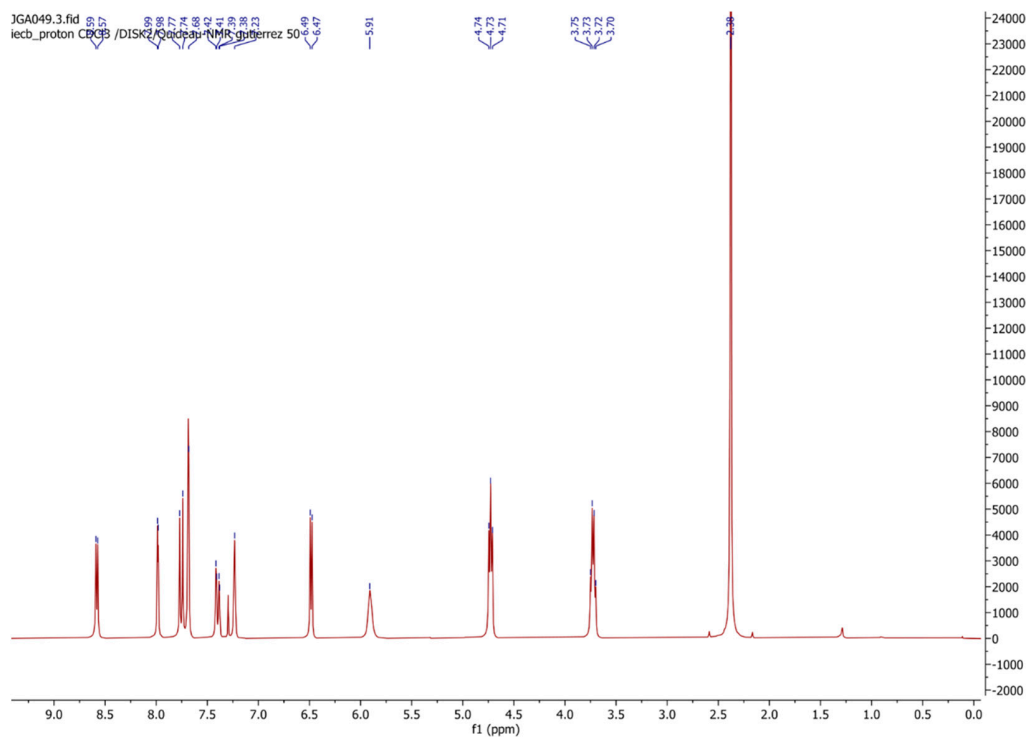

# S51. Comp. 4j

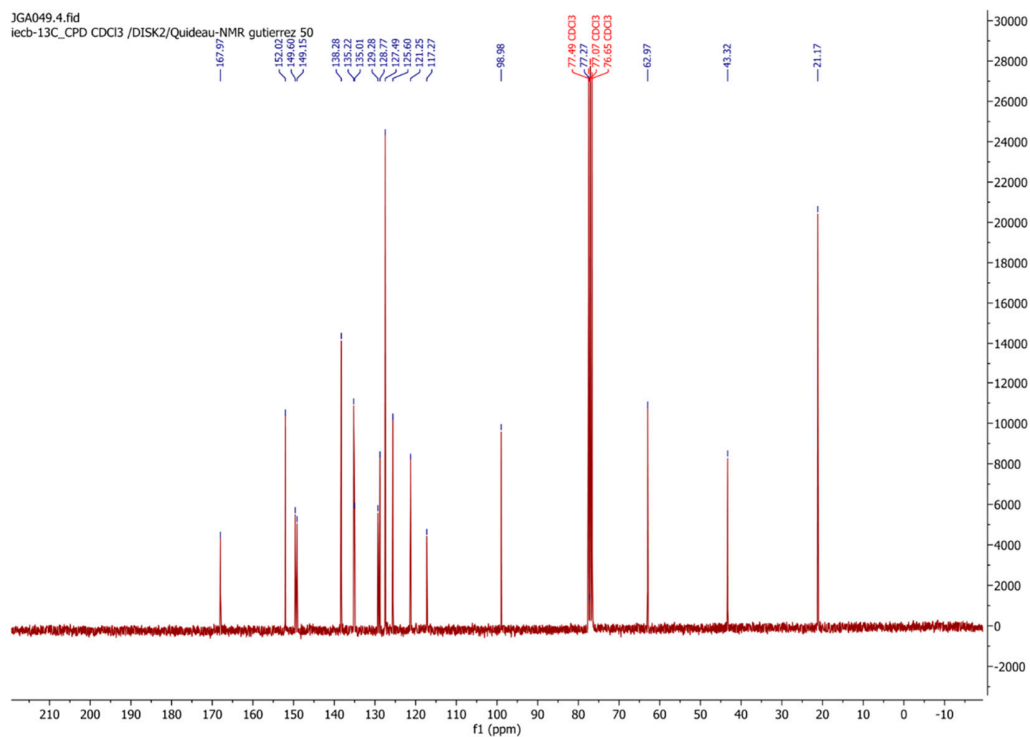

# S52. Comp. 4j

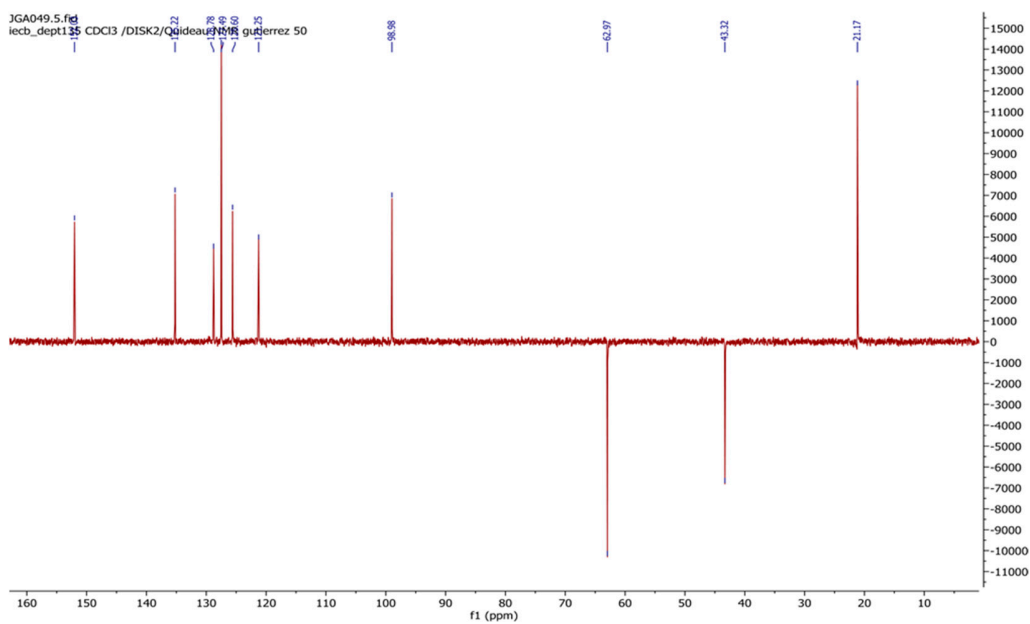

S53. Comp. 4I

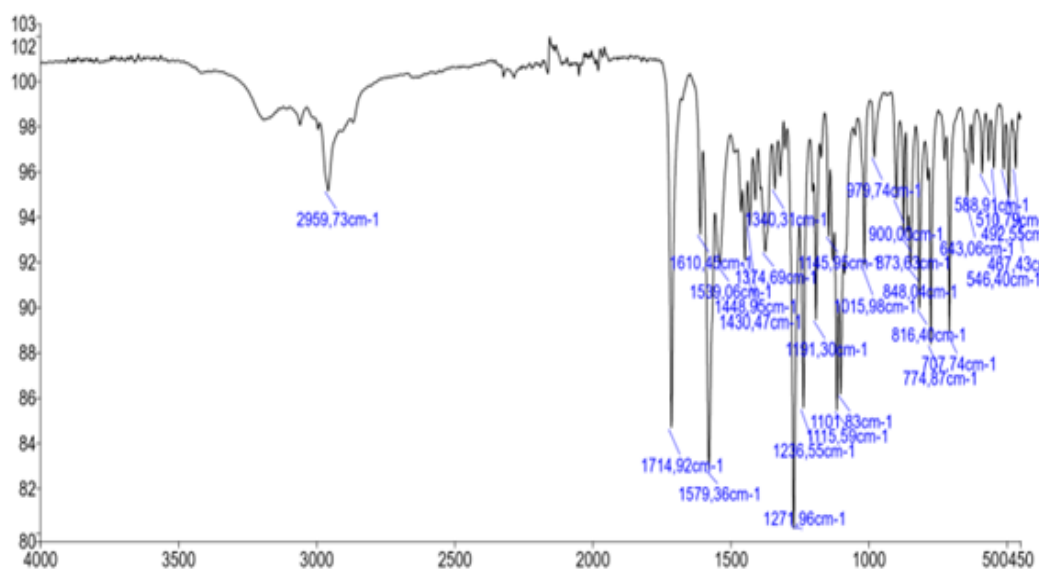

S54. Comp. 4I

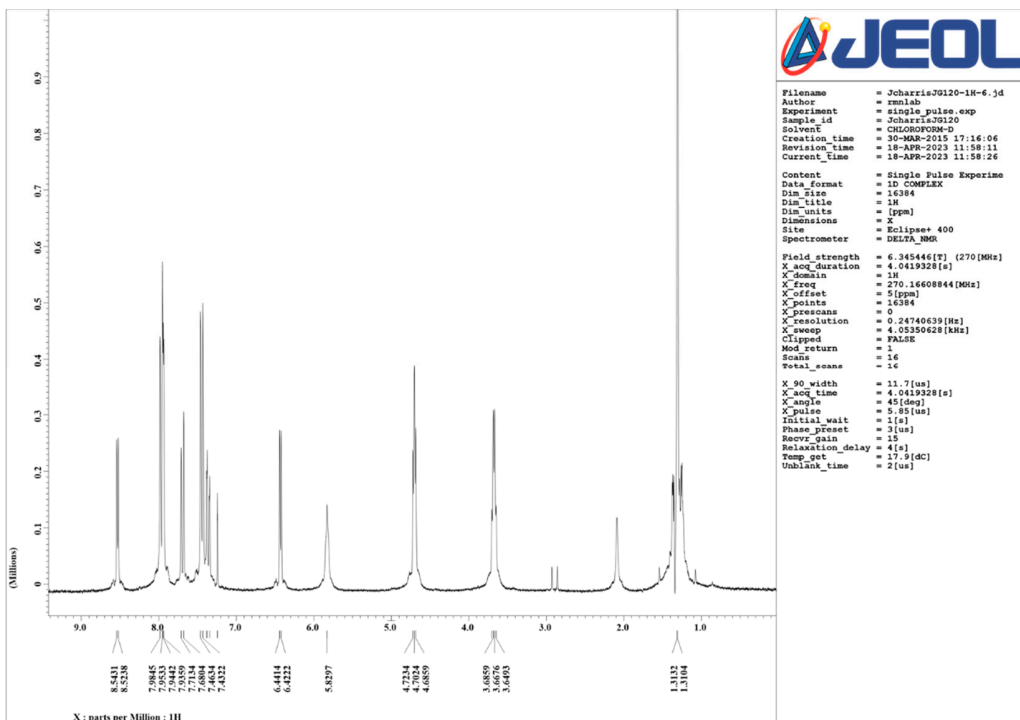

# S55. Comp. 4I

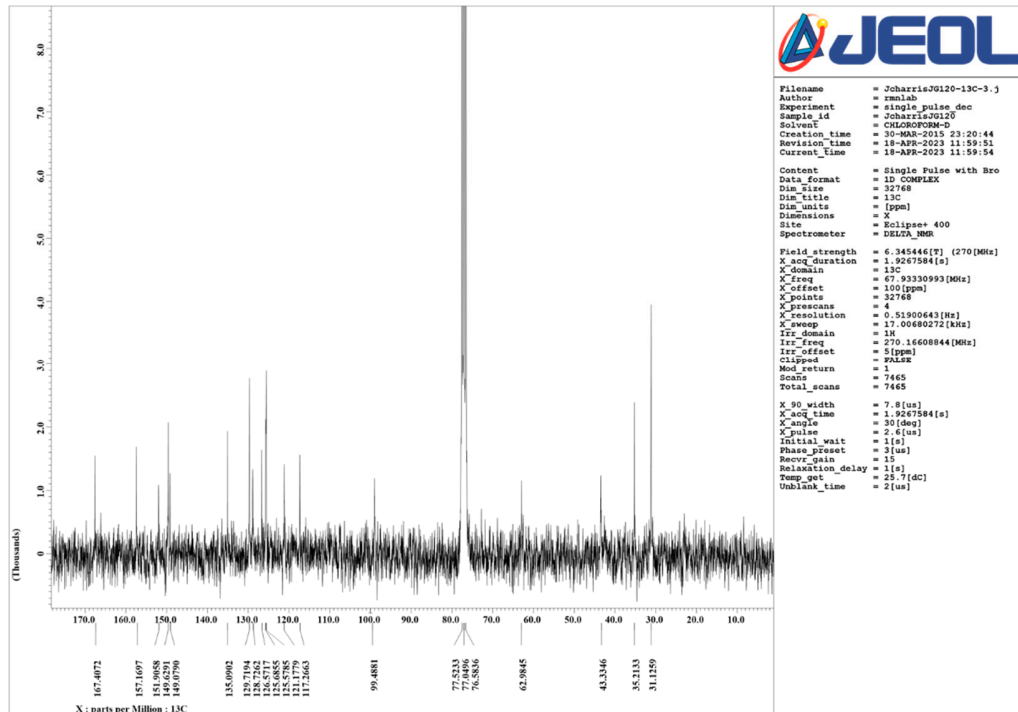

# S56. Comp. 4I

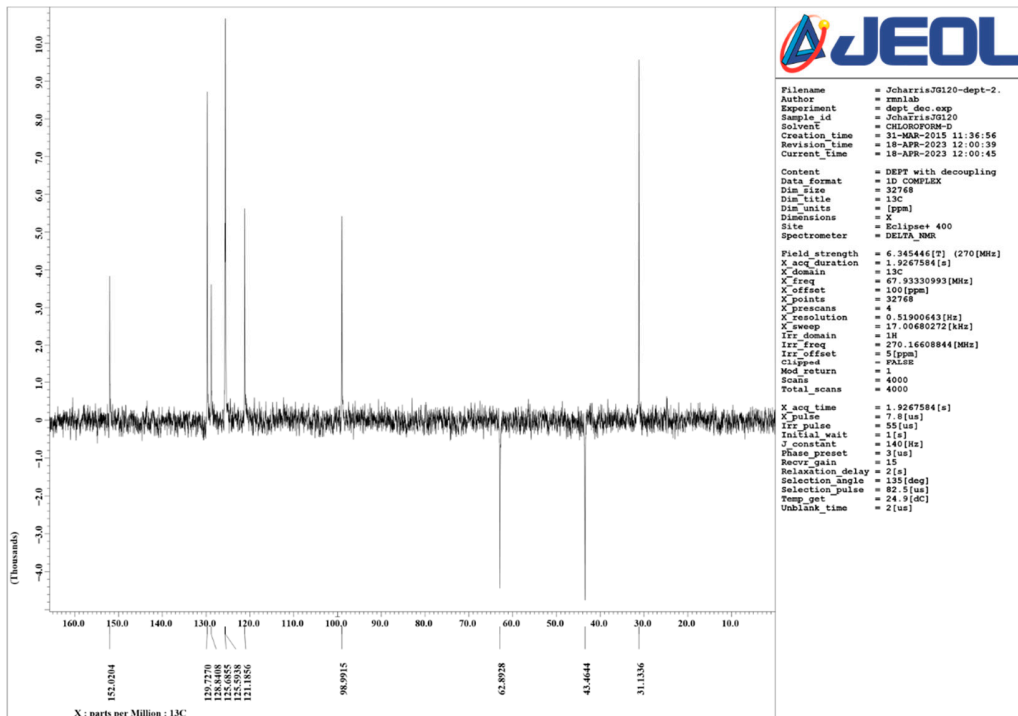

# S57. Comp. 4I

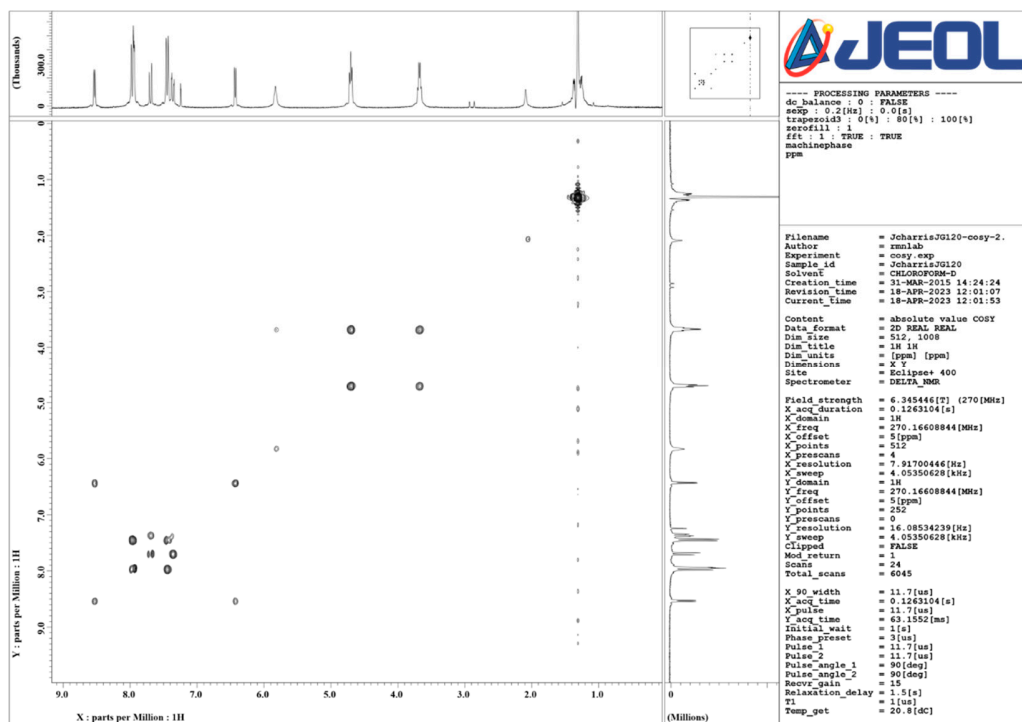

# S58. Comp. 4I

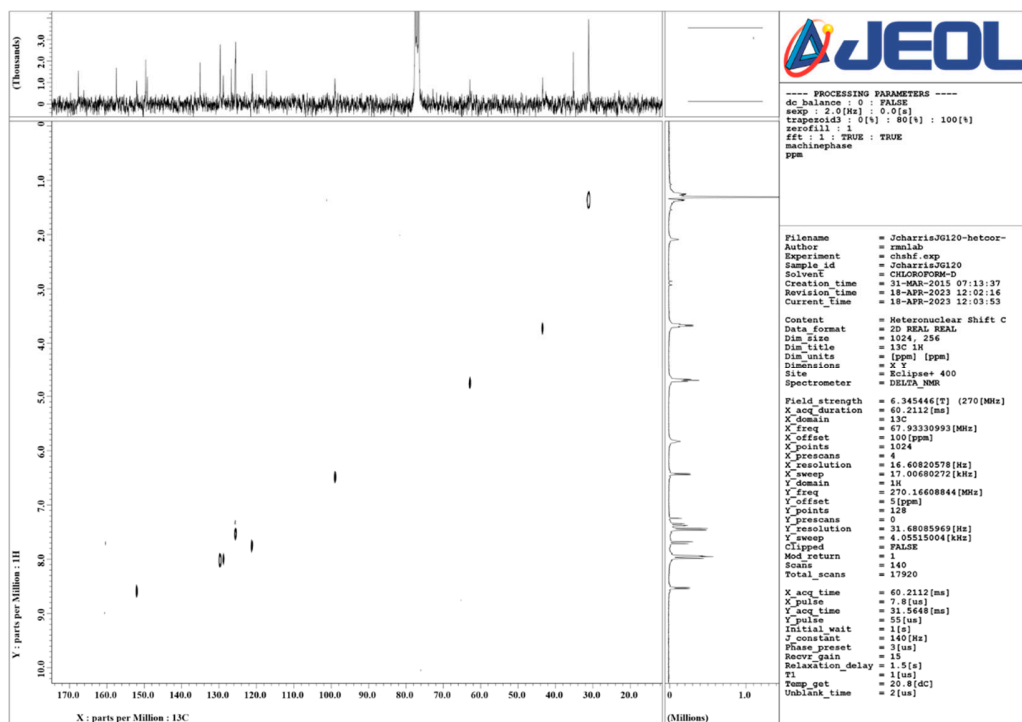

S59. Comp. 4m

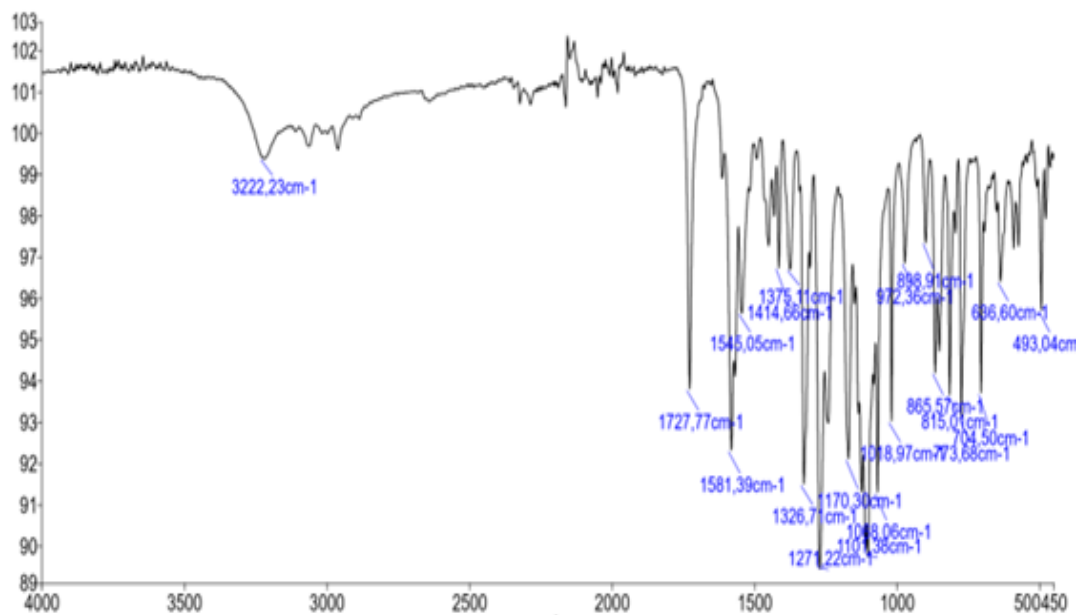

S60. Comp. 4m

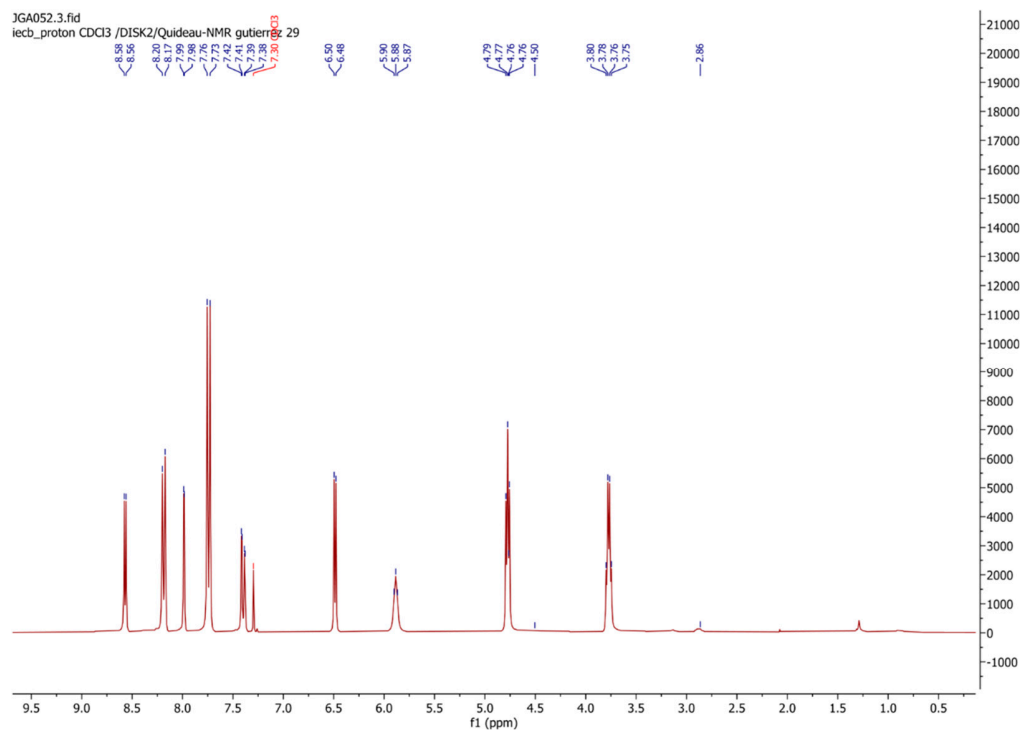

# S61. Comp. 4m

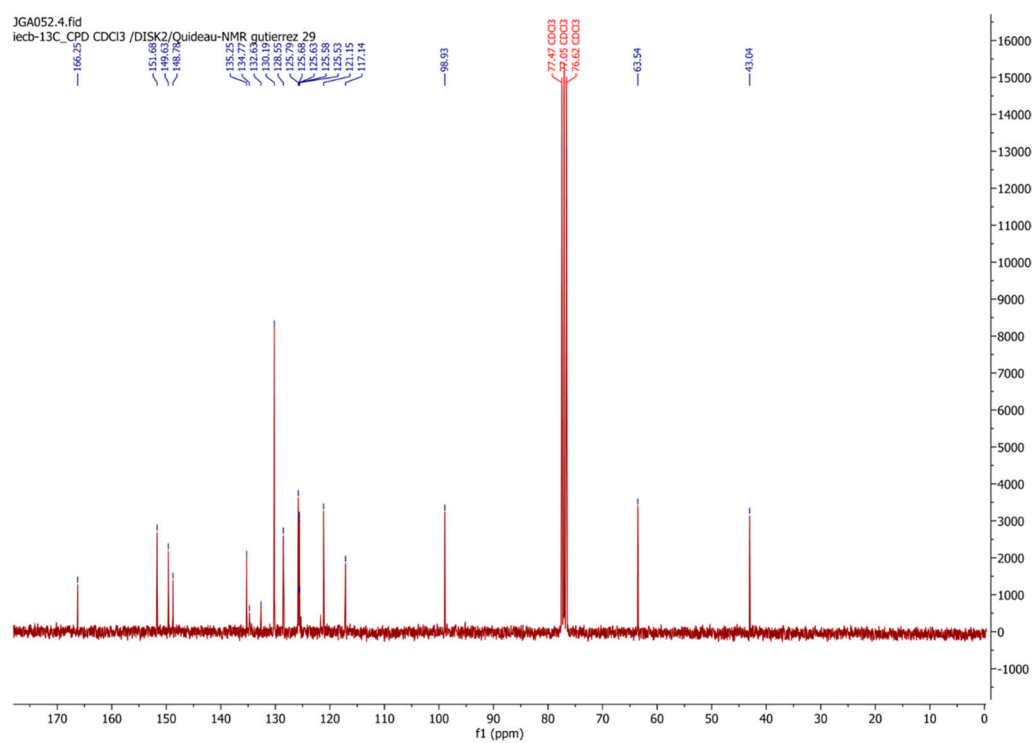

# S62. Comp. 4m

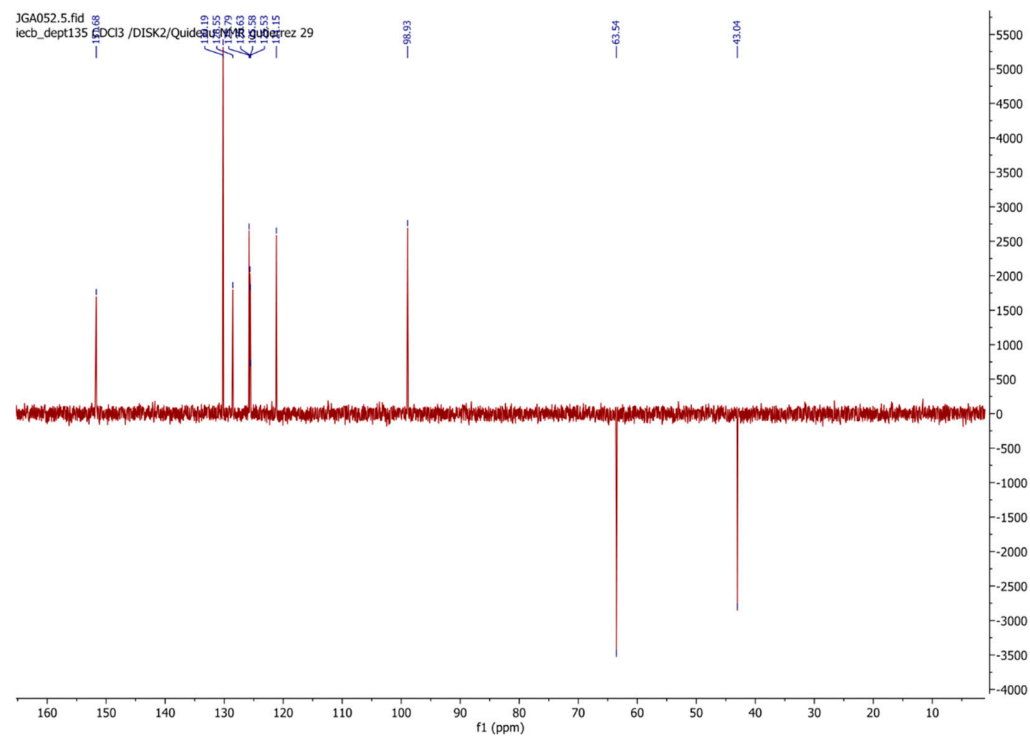



# S63. Comp. 4m

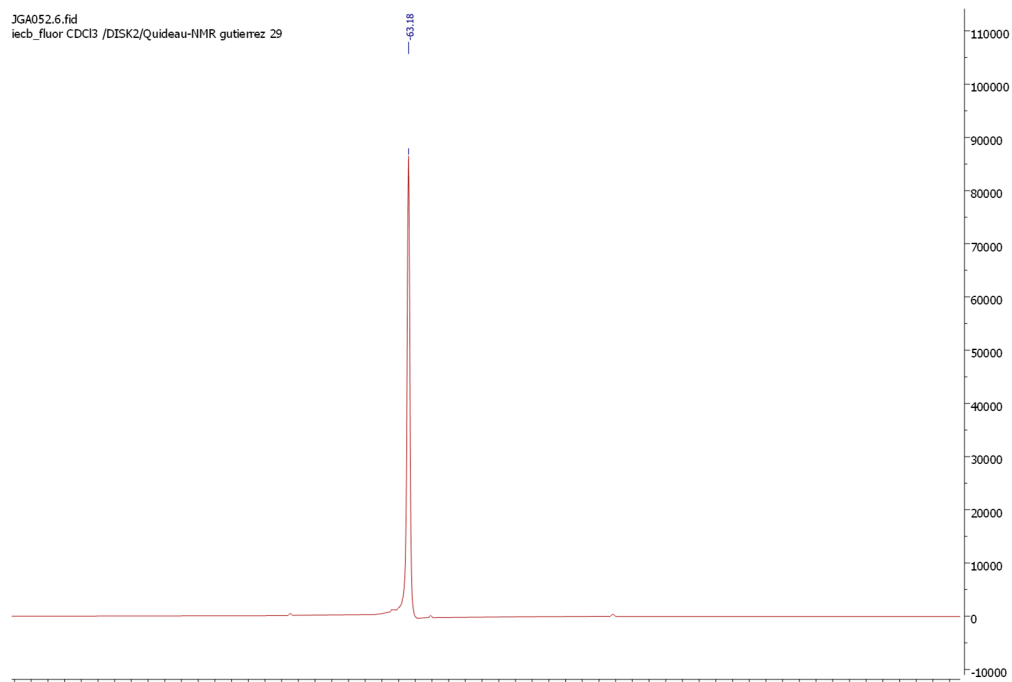

Supplement: s1 [file s1]
